# Supplementary material for: Investigation of the titanium-mediated catalytic enantioselective oxidation of aryl benzyl sulfides containing heterocyclic groups
Source: Royal Society of Chemistry journal article supplement (doi:10.1039/d4ra07088g), 2024-01-01
Supplement: d4ra07088g1.pdf [file d4ra07088g1.pdf]

# *Electronic Supplementary Information for*

## **Investigation of the Titanium-Mediated Catalytic Enantioselective Oxidation of Aryl Benzyl Sulfides Containing Heterocyclic Groups.**

Maria Annunziata M. Capozzi,<sup>\*[a]</sup> Angel Alvarez-Larena,<sup>[b]</sup> Joan F. Piniella Febrer,<sup>[c]</sup> and Cosimo Cardellicchio.<sup>\*[d]</sup>

(a) Dipartimento di Chimica, Università di Bari, via Orabona 4, 70125 Bari, Italy. E-mail maria.capozzi@uniba.it

(b) Servei de Difracció de Raigs X, Universitat Autònoma de Barcelona, 08193 Bellaterra, Cerdanyola del Vallès, Barcelona, Spain.

(c) Departament de Geologia, Universitat Autònoma de Barcelona, 08193 Bellaterra, Cerdanyola del Vallès, Barcelona, Spain.

(d) CNR ICCOM, Dipartimento di Chimica, Università di Bari, via Orabona 4, 70125 Bari, Italy.

### **Index of Electronic Supplementary Information**

|                                                                                                         |          |
|---------------------------------------------------------------------------------------------------------|----------|
| Table S1. Enantioselective oxidation of benzimidazolyl benzyl sulfide                                   | p. 2     |
| Tables S2-S5. Crystal data and structure refinements.                                                   | p. 3-6   |
| Figures S1-S8. ORTEP plots and packing plots.                                                           | p. 7-10  |
| Tables S6-S9. <i>Crystal Explorer</i> estimates of lattice energies                                     | p. 11-14 |
| Tables S10. Geometric characteristic of stronger hydrogen bondings                                      | p. 15    |
| Figures S9-S10. Overlay of structures.                                                                  | p. 15    |
| Figures S11-S22 Graphical reports of spectra of compounds <b>2a</b> , <b>9a</b> , <b>2b</b> , <b>9b</b> | p. 16-27 |
| Figures S23-S33 Graphical reports of HPLC separations                                                   | p. 28-38 |

**Table S1.** Enantioselective oxidation of benzimidazolyl benzyl sulfide **5a** to obtain benzimidazolyl benzyl sulfoxide **5b** with hydroperoxides in the presence of a complex between titanium and (*S,S*)-hydrobenzoin. Other solvents.

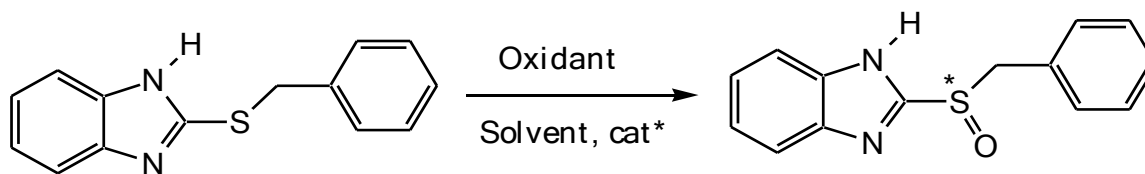

cat\* = 5% 1:2 complex Ti(O-*i*-Pr)<sub>4</sub>/(*S,S*)-hydrobenzoin

| Entry | Oxidant | Solvent                  | Yield | ee |
|-------|---------|--------------------------|-------|----|
| 1     | TBHP    | Propylene carbonate      | 21    | 12 |
| 2     | TBHP    | Methylene chloride       | 90    | 21 |
| 3     | TBHP    | Dimethyl carbonate       | 70    | 20 |
| 4     | CHP     | Dimethyl carbonate       | 58    | 7  |
| 5     | TBHP    | Cyclopentyl methyl ether | 62    | 7  |
| 6     | CHP     | Cyclopentyl methyl ether | 55    | 22 |

**Table S2.** Crystal data and structure refinement for (*R*)-2-(2,3,4,5,6-pentafluorobenzylsulfinyl)-thiophene **2b**.

|                                   |                                                               |          |
|-----------------------------------|---------------------------------------------------------------|----------|
| Empirical formula                 | C <sub>11</sub> H <sub>5</sub> F <sub>5</sub> OS <sub>2</sub> |          |
| Formula weight                    | 312.27                                                        |          |
| Temperature                       | 296(2) K                                                      |          |
| Wavelength                        | 0.71073 Å                                                     |          |
| Crystal system                    | Orthorhombic                                                  |          |
| Space group                       | P 2 <sub>1</sub> 2 <sub>1</sub> 2 <sub>1</sub>                |          |
| Unit cell dimensions              | a = 5.4947(11) Å                                              | α = 90°. |
|                                   | b = 9.2154(18) Å                                              | β = 90°. |
|                                   | c = 23.473(5) Å                                               | γ = 90°. |
| Volume                            | 1188.6(4) Å <sup>3</sup>                                      |          |
| Z                                 | 4                                                             |          |
| Density (calculated)              | 1.745 Mg/m <sup>3</sup>                                       |          |
| Absorption coefficient            | 0.499 mm <sup>-1</sup>                                        |          |
| F(000)                            | 624                                                           |          |
| Crystal size                      | 0.800 x 0.520 x 0.270 mm <sup>3</sup>                         |          |
| Theta range for data collection   | 1.735 to 28.709°.                                             |          |
| Index ranges                      | -7<=h<=7, -12<=k<=11, -31<=l<=31                              |          |
| Reflections collected             | 9421                                                          |          |
| Independent reflections           | 2891 [R(int) = 0.0126]                                        |          |
| Completeness to theta = 25.000°   | 100.0 %                                                       |          |
| Absorption correction             | Semi-empirical from equivalents                               |          |
| Max. and min. transmission        | 1 and 0.84                                                    |          |
| Refinement method                 | Full-matrix least-squares on F <sup>2</sup>                   |          |
| Data / restraints / parameters    | 2891 / 0 / 172                                                |          |
| Goodness-of-fit on F <sup>2</sup> | 1.078                                                         |          |
| Final R indices [I>2sigma(I)]     | R1 = 0.0407, wR2 = 0.1218                                     |          |
| R indices (all data)              | R1 = 0.0420, wR2 = 0.1236                                     |          |
| Absolute structure parameter      | 0.023(16)                                                     |          |
| Extinction coefficient            | n/a                                                           |          |
| Largest diff. peak and hole       | 0.534 and -0.308 e.Å <sup>-3</sup>                            |          |

**Table S3.** Crystal data and structure refinement for (*R*)-2-(benzylsulfinyl)-1*H*-benzo[d]imidazole **5b**.

|                                   |                                                                                                        |
|-----------------------------------|--------------------------------------------------------------------------------------------------------|
| Empirical formula                 | C <sub>14</sub> H <sub>12</sub> N <sub>2</sub> OS                                                      |
| Formula weight                    | 256.32                                                                                                 |
| Temperature                       | 296(2) K                                                                                               |
| Wavelength                        | 0.71073 Å                                                                                              |
| Crystal system                    | Hexagonal                                                                                              |
| Space group                       | P 6 <sub>4</sub>                                                                                       |
| Unit cell dimensions              | a = 13.2625(10) Å      α = 90°.<br>b = 13.2625(10) Å      β = 90°.<br>c = 12.4674(10) Å      γ = 120°. |
| Volume                            | 1899.1(3) Å <sup>3</sup>                                                                               |
| Z                                 | 6                                                                                                      |
| Density (calculated)              | 1.345 Mg/m <sup>3</sup>                                                                                |
| Absorption coefficient            | 0.244 mm <sup>-1</sup>                                                                                 |
| F(000)                            | 804                                                                                                    |
| Crystal size                      | 0.240 x 0.080 x 0.070 mm <sup>3</sup>                                                                  |
| Theta range for data collection   | 1.773 to 28.744°.                                                                                      |
| Index ranges                      | -17 ≤ h ≤ 17, -17 ≤ k ≤ 17, -16 ≤ l ≤ 16                                                               |
| Reflections collected             | 17934                                                                                                  |
| Independent reflections           | 3030 [R(int) = 0.0778]                                                                                 |
| Completeness to theta = 25.000°   | 100.0 %                                                                                                |
| Absorption correction             | Semi-empirical from equivalents                                                                        |
| Max. and min. transmission        | 1 and 0.8538                                                                                           |
| Refinement method                 | Full-matrix least-squares on F <sup>2</sup>                                                            |
| Data / restraints / parameters    | 3030 / 1 / 166                                                                                         |
| Goodness-of-fit on F <sup>2</sup> | 1.096                                                                                                  |
| Final R indices [I > 2σ(I)]       | R1 = 0.0659, wR2 = 0.0907                                                                              |
| R indices (all data)              | R1 = 0.1141, wR2 = 0.1026                                                                              |
| Absolute structure parameter      | 0.10(5)                                                                                                |
| Extinction coefficient            | n/a                                                                                                    |
| Largest diff. peak and hole       | 0.243 and -0.199 e.Å <sup>-3</sup>                                                                     |

**Table S4.** Crystal data and structure refinement for (*R*)-2-(2,3,4,5,6-pentafluorobenzylsulfinyl)-*1H*-benzo[d]imidazole **9b**.

|                                   |                                                                 |                 |
|-----------------------------------|-----------------------------------------------------------------|-----------------|
| Empirical formula                 | C <sub>14</sub> H <sub>7</sub> F <sub>5</sub> N <sub>2</sub> OS |                 |
| Formula weight                    | 346.28                                                          |                 |
| Temperature                       | 296(2) K                                                        |                 |
| Wavelength                        | 0.71073 Å                                                       |                 |
| Crystal system                    | Monoclinic                                                      |                 |
| Space group                       | P 2 <sub>1</sub>                                                |                 |
| Unit cell dimensions              | a = 8.1880(4) Å                                                 | α = 90°.        |
|                                   | b = 7.0323(4) Å                                                 | β = 102.82(3)°. |
|                                   | c = 12.3527(7) Å                                                | γ = 90°.        |
| Volume                            | 693.55(10) Å <sup>3</sup>                                       |                 |
| Z                                 | 2                                                               |                 |
| Density (calculated)              | 1.658 Mg/m <sup>3</sup>                                         |                 |
| Absorption coefficient            | 0.296 mm <sup>-1</sup>                                          |                 |
| F(000)                            | 348                                                             |                 |
| Crystal size                      | 0.580 x 0.280 x 0.210 mm <sup>3</sup>                           |                 |
| Theta range for data collection   | 1.691 to 28.509°.                                               |                 |
| Index ranges                      | -10 ≤ h ≤ 10, -9 ≤ k ≤ 9, -16 ≤ l ≤ 16                          |                 |
| Reflections collected             | 5473                                                            |                 |
| Independent reflections           | 3134 [R(int) = 0.0107]                                          |                 |
| Completeness to theta = 25.000°   | 99.8 %                                                          |                 |
| Absorption correction             | Semi-empirical from equivalents                                 |                 |
| Max. and min. transmission        | 1 and 0.89                                                      |                 |
| Refinement method                 | Full-matrix least-squares on F <sup>2</sup>                     |                 |
| Data / restraints / parameters    | 3134 / 1 / 212                                                  |                 |
| Goodness-of-fit on F <sup>2</sup> | 1.056                                                           |                 |
| Final R indices [I > 2σ(I)]       | R1 = 0.0351, wR2 = 0.0965                                       |                 |
| R indices (all data)              | R1 = 0.0361, wR2 = 0.0976                                       |                 |
| Absolute structure parameter      | 0.065(19)                                                       |                 |
| Extinction coefficient            | n/a                                                             |                 |
| Largest diff. peak and hole       | 0.230 and -0.181 e.Å <sup>-3</sup>                              |                 |

**Table S5.** Crystal data and structure refinement for benzylsulfinyl-*1H*-methyl-benzo[d]imidazole (*R*)-**10b**.

|                                   |                                                   |                    |
|-----------------------------------|---------------------------------------------------|--------------------|
| Empirical formula                 | C <sub>15</sub> H <sub>14</sub> N <sub>2</sub> OS |                    |
| Formula weight                    | 270.34                                            |                    |
| Temperature                       | 296(2) K                                          |                    |
| Wavelength                        | 0.71073 Å                                         |                    |
| Crystal system                    | Monoclinic                                        |                    |
| Space group                       | P 2 <sub>1</sub>                                  |                    |
| Unit cell dimensions              | a = 4.7062(4) Å                                   | α = 90°.           |
|                                   | b = 23.5001(18) Å                                 | β = 107.6410(10)°. |
|                                   | c = 6.3164(5) Å                                   | γ = 90°.           |
| Volume                            | 665.72(9) Å <sup>3</sup>                          |                    |
| Z                                 | 2                                                 |                    |
| Density (calculated)              | 1.349 Mg/m <sup>3</sup>                           |                    |
| Absorption coefficient            | 0.236 mm <sup>-1</sup>                            |                    |
| F(000)                            | 284                                               |                    |
| Crystal size                      | 0.600 x 0.400 x 0.300 mm <sup>3</sup>             |                    |
| Theta range for data collection   | 1.733 to 28.697°.                                 |                    |
| Index ranges                      | -6 ≤ h ≤ 6, -31 ≤ k ≤ 31, -8 ≤ l ≤ 8              |                    |
| Reflections collected             | 5272                                              |                    |
| Independent reflections           | 3065 [R(int) = 0.0195]                            |                    |
| Completeness to theta = 25.000°   | 99.8 %                                            |                    |
| Absorption correction             | Semi-empirical from equivalents                   |                    |
| Max. and min. transmission        | 1 and 0.799                                       |                    |
| Refinement method                 | Full-matrix least-squares on F <sup>2</sup>       |                    |
| Data / restraints / parameters    | 3065 / 1 / 173                                    |                    |
| Goodness-of-fit on F <sup>2</sup> | 1.094                                             |                    |
| Final R indices [I > 2σ(I)]       | R1 = 0.0446, wR2 = 0.1116                         |                    |
| R indices (all data)              | R1 = 0.0481, wR2 = 0.1142                         |                    |
| Absolute structure parameter      | 0.10(4)                                           |                    |
| Extinction coefficient            | n/a                                               |                    |
| Largest diff. peak and hole       | 0.453 and -0.203 e.Å <sup>-3</sup>                |                    |

**ORTEP plot and packing plot of sulfoxides (2b), (5b), (9b) and (10b)**

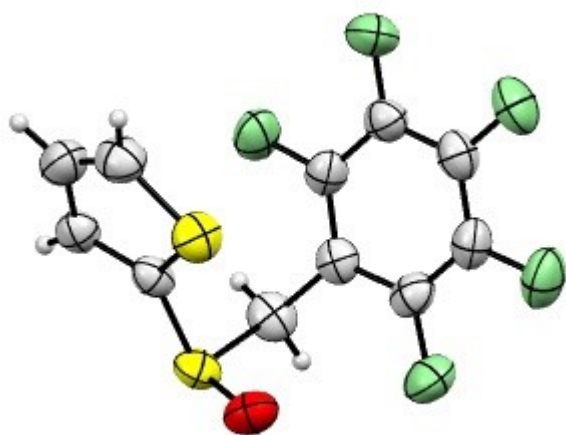

**Figure S1.** ORTEP plot (50% probability level) of (*R*)-2-(2,3,4,5,6-pentafluorobenzylsulfinyl)-thiophene **2b**.

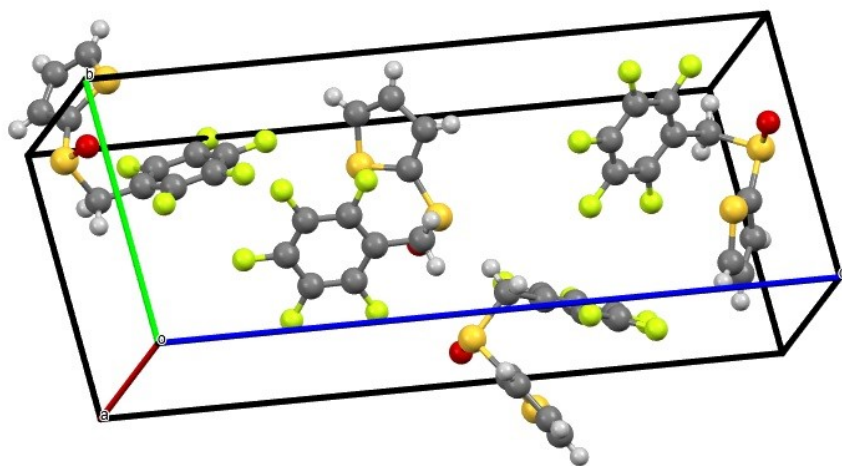

**Figure S2.** Packing plot of (*R*)-2-(2,3,4,5,6-pentafluorobenzylsulfinyl)-thiophene **2b**.

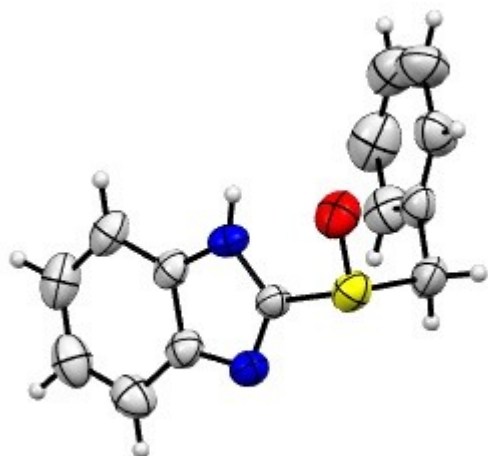

**Figure S3.** ORTEP plot (50% probability level) of (*R*)-2-(benzylsulfinyl)-1H-benzo[d]imidazole **5b**.

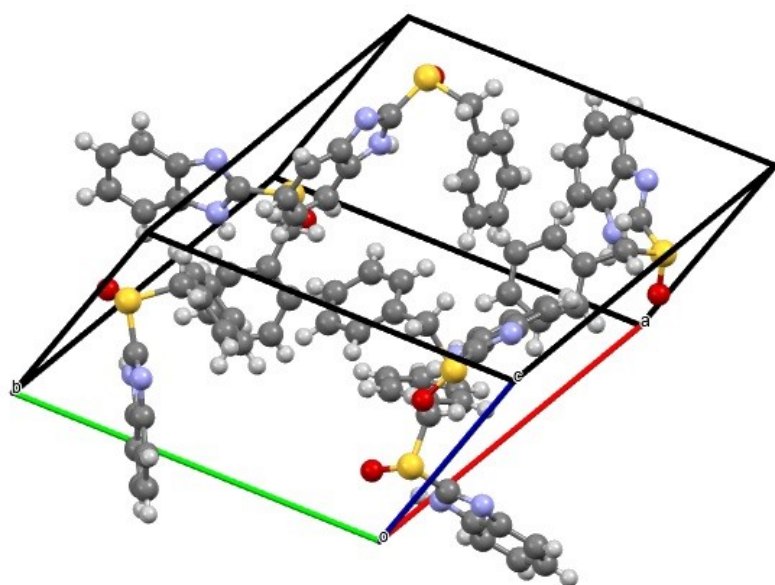

**Figure S4.** Packing plot of (*R*)-2-(benzylsulfinyl)-1H-benzo[d]imidazole **5b**.



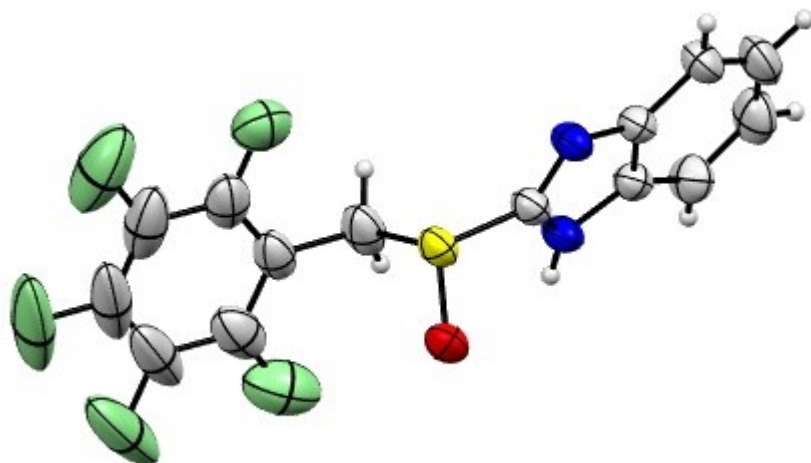

**Figure S5.** ORTEP plot (50% probability level) of (*R*)-2-(2,3,4,5,6-pentafluorobenzylsulfinyl)-1H-benzo[d]imidazole **9b**.

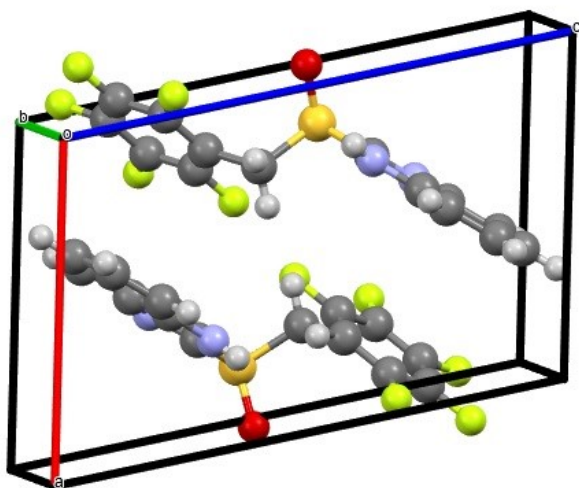

**Figure S6.** Packing plot of (*R*)-2-(2,3,4,5,6-pentafluorobenzylsulfinyl)-1H-benzo[d]imidazole **9b**.

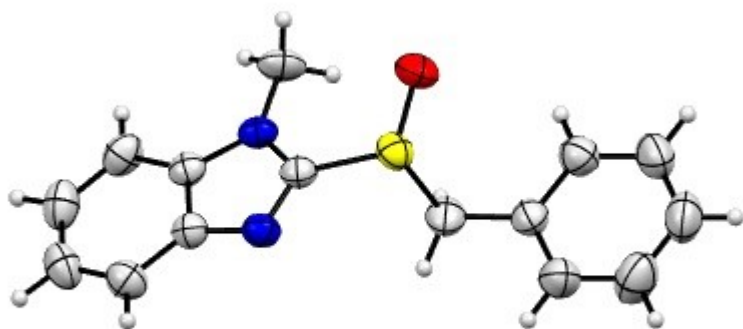

**Figure S7.** ORTEP plot (50% probability level) of 2-benzylsulfinyl-1-methyl-1-H-benzo[d]imidazole **10b**.

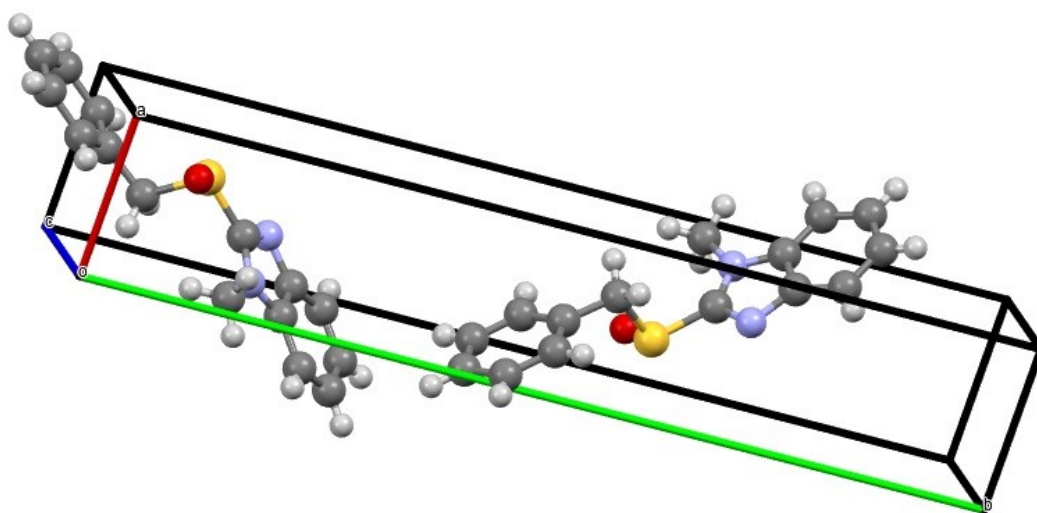

**Figure S8.** Packing plot of 2-benzylsulfinyl-1-methyl-1-H-benzo[d]imidazole **10b**.

## Outputs of pairwise lattice energy calculations.

B3LYP/6-31G(d,p) calculated electronic, polarisation, dispersion and repulsion energies are reported. The molecule interacting with the central molecule is identified by the distance R and the Symop. Further information on these output Tables can be obtained in the cited paper<sup>42</sup> and references therein.

**Table S6.** *Crystal Explorer 21* estimate of lattice energies (kJ/mol) for (*R*)-2-(2,3,4,5,6-pentafluorobenzylsulfinyl)-thiophene **2b**.

| N | Symop             | R     | Electron Density | E ele | E pol | E dis | E rep | E tot |        |
|---|-------------------|-------|------------------|-------|-------|-------|-------|-------|--------|
| 2 | x, y, z           | 5,49  | B3LYP/6-31G(d,p) | -18,1 | -4,5  | -36,4 | 25,4  | -38,4 | -38,4  |
| 2 | -x, y+1/2, -z+1/2 | 7,19  | B3LYP/6-31G(d,p) | -5,3  | -0,7  | -20,4 | 8,8   | -18,5 | -18,5  |
| 2 | -x, y+1/2, -z+1/2 | 7,59  | B3LYP/6-31G(d,p) | -2,6  | -0,6  | -16,9 | 6     | -14,2 | -14,2  |
| 2 | x+1/2, -y+1/2, -z | 9,17  | B3LYP/6-31G(d,p) | -2,3  | -1,3  | -18,7 | 12,6  | -12   | -12    |
| 2 | x+1/2, -y+1/2, -z | 8,06  | B3LYP/6-31G(d,p) | -3,5  | -3,3  | -13,3 | 11,2  | -10,9 | -10,9  |
| 2 | x, y, z           | 10,73 | B3LYP/6-31G(d,p) | -1,5  | -0,2  | -2    | 0,1   | -3,5  | -3,5   |
| 2 | x, y, z           | 9,22  | B3LYP/6-31G(d,p) | 2,3   | -0,7  | -7,5  | 1,9   | -3,4  | -3,4   |
| 2 | x+1/2, -y+1/2, -z | 11,19 | B3LYP/6-31G(d,p) | -2,2  | -0,1  | -0,5  | 0     | -2,9  | -2,9   |
| 2 | x, y, z           | 10,99 | B3LYP/6-31G(d,p) | -1,3  | -0,1  | -0,4  | 0     | -1,7  | -1,7   |
| 2 | -x, y+1/2, -z+1/2 | 10,3  | B3LYP/6-31G(d,p) | -0,6  | 0     | -0,9  | 0     | -1,4  | -1,4   |
| 2 | x+1/2, -y+1/2, -z | 12,02 | B3LYP/6-31G(d,p) | -0,6  | -0,1  | -0,6  | 0     | -1,2  | -1,2   |
| 2 | x, y, z           | 14,34 | B3LYP/6-31G(d,p) | -1    | 0     | -0,1  | 0     | -1,2  | -1,2   |
| 2 | -x+1/2, -y, z+1/2 | 11,79 | B3LYP/6-31G(d,p) | -0,3  | 0     | -0,8  | 0     | -1    | -1     |
| 2 | -x, y+1/2, -z+1/2 | 15,08 | B3LYP/6-31G(d,p) | -0,4  | 0     | -0,1  | 0     | -0,5  | -0,5   |
| 2 | -x+1/2, -y, z+1/2 | 12,78 | B3LYP/6-31G(d,p) | 0     | 0     | -0,4  | 0     | -0,4  | -0,4   |
| 2 | -x+1/2, -y, z+1/2 | 14,31 | B3LYP/6-31G(d,p) | -0,2  | 0     | -0,1  | 0     | -0,4  | -0,4   |
| 2 | -x, y+1/2, -z+1/2 | 14,88 | B3LYP/6-31G(d,p) | -0,3  | 0     | -0,1  | 0     | -0,4  | -0,4   |
| 2 | -x+1/2, -y, z+1/2 | 15,59 | B3LYP/6-31G(d,p) | -0,3  | 0     | -0,1  | 0     | -0,4  | -0,4   |
| 2 | -x+1/2, -y, z+1/2 | 15,14 | B3LYP/6-31G(d,p) | -0,2  | 0     | -0,1  | 0     | -0,3  | -0,3   |
| 2 | -x+1/2, -y, z+1/2 | 16,35 | B3LYP/6-31G(d,p) | -0,1  | 0     | -0,1  | 0     | -0,2  | -0,2   |
| 2 | x, y, z           | 14,34 | B3LYP/6-31G(d,p) | 0     | 0     | -0,1  | 0     | -0,1  | -0,1   |
| 2 | -x+1/2, -y, z+1/2 | 15,75 | B3LYP/6-31G(d,p) | 0     | 0     | -0,1  | 0     | -0,1  | -0,1   |
| 2 | -x, y+1/2, -z+1/2 | 11,13 | B3LYP/6-31G(d,p) | 0,4   | 0     | -0,5  | 0     | 0     | 0      |
| 2 | -x+1/2, -y, z+1/2 | 13,24 | B3LYP/6-31G(d,p) | 0,2   | 0     | -0,2  | 0     | 0     | 0      |
| 2 | -x+1/2, -y, z+1/2 | 15,52 | B3LYP/6-31G(d,p) | 0,1   | 0     | -0,1  | 0     | 0     | 0      |
| 2 | x+1/2, -y+1/2, -z | 17,39 | B3LYP/6-31G(d,p) | 0,2   | 0     | 0     | 0     | 0,2   | 0,2    |
| 2 | x, y, z           | 10,73 | B3LYP/6-31G(d,p) | 1     | -0,1  | -0,7  | 0     | 0,3   | 0,3    |
| 2 | x+1/2, -y+1/2, -z | 14,68 | B3LYP/6-31G(d,p) | 0,4   | 0     | -0,1  | 0     | 0,4   | 0,4    |
| 2 | x+1/2, -y+1/2, -z | 16,52 | B3LYP/6-31G(d,p) | 0,5   | 0     | -0,1  | 0     | 0,5   | 0,5    |
|   |                   |       |                  |       |       |       |       |       | -111,7 |

**Table S7.** *Crystal Explorer 21* estimate of lattice energies (kJ/mol) for (*R*)-2-(benzylsulfinyl)-1H-benzo[d]imidazole **5b**.

| N | Symop           | R     | Electron Density | E ele | E pol | E dis | E rep | E tot |        |
|---|-----------------|-------|------------------|-------|-------|-------|-------|-------|--------|
| 1 | x-y, x, z+2/3   | 5.34  | B3LYP/6-31G(d,p) | -60.7 | -15.3 | -42.3 | 78.2  | -64.1 | -32.05 |
| 1 | y, -x+y, z+1/3  | 5.34  | B3LYP/6-31G(d,p) | -60.7 | -15.3 | -42.3 | 78.2  | -64.1 | -32.05 |
| 2 | -y, x-y, z+1/3  | 7.13  | B3LYP/6-31G(d,p) | -8.8  | -2.3  | -27.2 | 18.1  | -23.5 | -23.5  |
| 1 | -x, -y, z       | 6.61  | B3LYP/6-31G(d,p) | -4.6  | -1.3  | -33.4 | 21.1  | -21.9 | -10.95 |
| 1 | -x, -y, z       | 12    | B3LYP/6-31G(d,p) | -1.8  | -0.2  | -6.7  | 0     | -7.9  | -3.95  |
| 2 | y, -x+y, z+1/3  | 10.76 | B3LYP/6-31G(d,p) | -1.8  | -0.3  | -10.9 | 6.2   | -7.8  | -7.8   |
| 2 | -x+y, -x, z+2/3 | 9.38  | B3LYP/6-31G(d,p) | -1.4  | -0.3  | -10.4 | 5     | -7.7  | -7.7   |
| 1 | -x, -y, z       | 6.69  | B3LYP/6-31G(d,p) | 0.6   | -1.6  | -15.8 | 13.2  | -6.2  | -3.1   |
| 1 | -x, -y, z       | 10.97 | B3LYP/6-31G(d,p) | -0.4  | -0.2  | -6.4  | 1.9   | -4.9  | -2.45  |
| 2 | -x+y, -x, z+2/3 | 10    | B3LYP/6-31G(d,p) | -0.2  | -0.1  | -3.8  | 0.1   | -3.4  | -3.4   |
| 1 | y, -x+y, z+1/3  | 8.96  | B3LYP/6-31G(d,p) | 1.9   | -0.3  | -5.4  | 1.2   | -2.2  | -1.1   |
| 1 | x-y, x, z+2/3   | 8.96  | B3LYP/6-31G(d,p) | 1.9   | -0.3  | -5.4  | 1.2   | -2.2  | -1.1   |
| 1 | -y, x-y, z+1/3  | 10.13 | B3LYP/6-31G(d,p) | -0.8  | -0.1  | -0.7  | 0     | -1.6  | -0.8   |
| 1 | -x+y, -x, z+2/3 | 10.13 | B3LYP/6-31G(d,p) | -0.8  | -0.1  | -0.7  | 0     | -1.6  | -0.8   |
| 2 | x, y, z         | 13.26 | B3LYP/6-31G(d,p) | -0.6  | 0     | -0.5  | 0     | -1.1  | -1.1   |
| 2 | x-y, x, z+2/3   | 12.42 | B3LYP/6-31G(d,p) | -0.5  | 0     | -0.5  | 0     | -1    | -1     |
| 2 | x, y, z         | 13.26 | B3LYP/6-31G(d,p) | -0.4  | 0     | -0.2  | 0     | -0.6  | -0.6   |
| 2 | x, y, z         | 13.26 | B3LYP/6-31G(d,p) | 0     | 0     | -0.6  | 0     | -0.5  | -0.5   |
| 2 | y, -x+y, z+1/3  | 14.76 | B3LYP/6-31G(d,p) | -0.4  | 0     | -0.1  | 0     | -0.5  | -0.5   |
| 2 | -y, x-y, z+1/3  | 12.32 | B3LYP/6-31G(d,p) | 0.1   | 0     | -0.6  | 0     | -0.4  | -0.4   |
| 1 | x-y, x, z+2/3   | 12.95 | B3LYP/6-31G(d,p) | -0.1  | 0     | -0.3  | 0     | -0.4  | -0.2   |
| 2 | -x, -y, z       | 14.15 | B3LYP/6-31G(d,p) | -0.3  | 0     | -0.1  | 0     | -0.4  | -0.4   |
| 2 | x-y, x, z+2/3   | 15.58 | B3LYP/6-31G(d,p) | -0.3  | 0     | -0.1  | 0     | -0.4  | -0.4   |
| 2 | -y, x-y, z+1/3  | 11.83 | B3LYP/6-31G(d,p) | 0.2   | 0     | -0.6  | 0     | -0.3  | -0.3   |
| 2 | y, -x+y, z+1/3  | 12.89 | B3LYP/6-31G(d,p) | 0     | 0     | -0.3  | 0     | -0.3  | -0.3   |
| 1 | y, -x+y, z+1/3  | 12.95 | B3LYP/6-31G(d,p) | 0     | 0     | -0.3  | 0     | -0.3  | -0.15  |
| 2 | -y, x-y, z+1/3  | 14.66 | B3LYP/6-31G(d,p) | -0.1  | 0     | -0.1  | 0     | -0.3  | -0.3   |
| 2 | -y, x-y, z+1/3  | 15.45 | B3LYP/6-31G(d,p) | -0.1  | 0     | -0.1  | 0     | -0.3  | -0.3   |
| 2 | -y, x-y, z+1/3  | 16.33 | B3LYP/6-31G(d,p) | -0.2  | 0     | -0.1  | 0     | -0.3  | -0.3   |
| 2 | y, -x+y, z+1/3  | 15.96 | B3LYP/6-31G(d,p) | -0.1  | 0     | -0.1  | 0     | -0.2  | -0.2   |
| 2 | x-y, x, z+2/3   | 17.5  | B3LYP/6-31G(d,p) | -0.1  | 0     | -0.1  | 0     | -0.2  | -0.2   |
| 2 | -x, -y, z       | 17.31 | B3LYP/6-31G(d,p) | 0     | 0     | -0.1  | 0     | -0.1  | -0.1   |
| 2 | -x, -y, z       | 14.11 | B3LYP/6-31G(d,p) | 0.1   | 0     | -0.1  | 0     | 0     | 0      |
| 2 | -x, -y, z       | 16.61 | B3LYP/6-31G(d,p) | 0     | 0     | -0.1  | 0     | 0     | 0      |
| 2 | x-y, x, z+2/3   | 17.11 | B3LYP/6-31G(d,p) | 0.2   | 0     | -0.1  | 0     | 0.1   | 0.1    |
| 1 | -x, -y, z       | 17.18 | B3LYP/6-31G(d,p) | 0.1   | 0     | -0.1  | 0     | 0.1   | 0.05   |
| 2 | x, y, z         | 18.2  | B3LYP/6-31G(d,p) | 0.1   | 0     | 0     | 0     | 0.1   | 0.1    |
| 2 | x, y, z         | 12.47 | B3LYP/6-31G(d,p) | 0.4   | 0     | -0.2  | 0     | 0.2   | 0.2    |
| 2 | x-y, x, z+2/3   | 14.35 | B3LYP/6-31G(d,p) | 0.3   | 0     | -0.1  | 0     | 0.2   | 0.2    |

-137.35

**Table S8.** *Crystal Explorer 21* estimate of lattice energies (kJ/mol) for (*R*)-2-(2,3,4,5,6-pentafluorobenzylsulfanyl)-1H-benzo[d]imidazole **9b**.

| N | Symop         | R     | Electron Density | E_ele | E_pol | E_dis | E_rep | E_tot  |
|---|---------------|-------|------------------|-------|-------|-------|-------|--------|
| 2 | -x, y+1/2, -z | 5,13  | B3LYP/6-31G(d,p) | -60,5 | -16,7 | -51,1 | 70,8  | -77,1  |
| 2 | -x, y+1/2, -z | 5,82  | B3LYP/6-31G(d,p) | -4,4  | -2    | -40,7 | 19,1  | -29,8  |
| 2 | x, y, z       | 7,03  | B3LYP/6-31G(d,p) | -6,4  | -3,1  | -23,9 | 13,6  | -21,5  |
| 2 | x, y, z       | 14,97 | B3LYP/6-31G(d,p) | -2,3  | -0,2  | -6,8  | 0     | -8,5   |
| 2 | -x, y+1/2, -z | 13,5  | B3LYP/6-31G(d,p) | 1,8   | -0,5  | -10,3 | 0     | -7,4   |
| 2 | -x, y+1/2, -z | 11,76 | B3LYP/6-31G(d,p) | -0,8  | -0,1  | -6,1  | 1,2   | -5,5   |
| 2 | -x, y+1/2, -z | 11,52 | B3LYP/6-31G(d,p) | -0,8  | -0,2  | -4,8  | 1,5   | -4,2   |
| 2 | x, y, z       | 13,22 | B3LYP/6-31G(d,p) | -1,3  | -0,1  | -2,9  | 0     | -4     |
| 2 | x, y, z       | 8,19  | B3LYP/6-31G(d,p) | -0,7  | -0,3  | -2,3  | 0     | -2,9   |
| 2 | x, y, z       | 10,79 | B3LYP/6-31G(d,p) | -1,4  | -0,1  | -0,7  | 0     | -2,2   |
| 2 | -x, y+1/2, -z | 11,19 | B3LYP/6-31G(d,p) | -0,6  | -0,1  | -1,4  | 0     | -1,9   |
| 2 | x, y, z       | 14,06 | B3LYP/6-31G(d,p) | -0,5  | 0     | -0,2  | 0     | -0,7   |
| 2 | -x, y+1/2, -z | 16,76 | B3LYP/6-31G(d,p) | -0,4  | 0     | -0,2  | 0     | -0,6   |
| 2 | -x, y+1/2, -z | 18,18 | B3LYP/6-31G(d,p) | -0,4  | 0     | -0,1  | 0     | -0,5   |
| 2 | x, y, z       | 19,3  | B3LYP/6-31G(d,p) | -0,4  | 0     | -0,1  | 0     | -0,5   |
| 2 | -x, y+1/2, -z | 15,4  | B3LYP/6-31G(d,p) | -0,2  | 0     | -0,1  | 0     | -0,3   |
| 2 | x, y, z       | 19,5  | B3LYP/6-31G(d,p) | -0,1  | 0     | 0     | 0     | -0,2   |
| 2 | -x, y+1/2, -z | 14,83 | B3LYP/6-31G(d,p) | 0,1   | 0     | -0,2  | 0     | -0,1   |
| 2 | -x, y+1/2, -z | 16,7  | B3LYP/6-31G(d,p) | 0,2   | 0     | -0,4  | 0     | -0,1   |
| 2 | -x, y+1/2, -z | 19,44 | B3LYP/6-31G(d,p) | 0     | 0     | -0,1  | 0     | -0,1   |
| 2 | x, y, z       | 18,72 | B3LYP/6-31G(d,p) | 0,1   | 0     | -0,1  | 0     | 0      |
| 2 | x, y, z       | 14,21 | B3LYP/6-31G(d,p) | 0,2   | 0     | -0,1  | 0     | 0,1    |
| 2 | -x, y+1/2, -z | 14,82 | B3LYP/6-31G(d,p) | 0,6   | 0     | -0,2  | 0     | 0,4    |
| 2 | x, y, z       | 14,97 | B3LYP/6-31G(d,p) | 0,6   | 0     | -0,1  | 0     | 0,5    |
| 2 | -x, y+1/2, -z | 13,81 | B3LYP/6-31G(d,p) | 0,8   | 0     | -0,2  | 0     | 0,7    |
| 2 | x, y, z       | 10,79 | B3LYP/6-31G(d,p) | 1,3   | -0,1  | -0,6  | 0     | 0,8    |
| 2 | x, y, z       | 12,35 | B3LYP/6-31G(d,p) | 1,8   | -0,1  | -0,9  | 0     | 1,1    |
| 2 | -x, y+1/2, -z | 12,37 | B3LYP/6-31G(d,p) | 1,3   | 0     | -0,2  | 0     | 1,2    |
| 2 | x, y, z       | 14,21 | B3LYP/6-31G(d,p) | 2,5   | 0     | -1,3  | 0     | 1,5    |
|   |               |       |                  |       |       |       |       | -161,8 |

**Table S9.** *Crystal Explorer 21* estimate of lattice energies (kJ/mol) for (*R*)-2-benzylsulfinyl-1-methyl-1-*H*-benzo[d]imidazole **10b**.

| <b>N</b> | <b>Symop</b>  | <b>R</b> | <b>Electron Density</b> | <b>E ele</b> | <b>E pol</b> | <b>E dis</b> | <b>E rep</b> | <b>E tot</b> |
|----------|---------------|----------|-------------------------|--------------|--------------|--------------|--------------|--------------|
| 2        | x, y, z       | 4.71     | B3LYP/6-31G(d,p)        | -12.1        | -5.1         | -62.6        | 32.8         | -50.8        |
| 2        | x, y, z       | 6.32     | B3LYP/6-31G(d,p)        | -13.1        | -4.6         | -28.5        | 21.5         | -28.7        |
| 2        | x, y, z       | 6.64     | B3LYP/6-31G(d,p)        | -12.1        | -3.7         | -29.7        | 25.4         | -25.7        |
| 2        | -x, y+1/2, -z | 12.2     | B3LYP/6-31G(d,p)        | -6.7         | -0.3         | -9.9         | 0            | -15.9        |
| 2        | -x, y+1/2, -z | 11.89    | B3LYP/6-31G(d,p)        | -3.2         | -0.4         | -11.3        | 7.7          | -8.7         |
| 2        | -x, y+1/2, -z | 12.81    | B3LYP/6-31G(d,p)        | -0.9         | -0.2         | -7.6         | 0            | -7.7         |
| 2        | x, y, z       | 9.62     | B3LYP/6-31G(d,p)        | -1.6         | -0.2         | -1.6         | 0            | -3.2         |
| 2        | -x, y+1/2, -z | 13.76    | B3LYP/6-31G(d,p)        | -1           | 0            | -1           | 0            | -2           |
| 2        | x, y, z       | 8.95     | B3LYP/6-31G(d,p)        | -0.2         | -0.1         | -1.7         | 0            | -1.8         |
| 2        | x, y, z       | 9.41     | B3LYP/6-31G(d,p)        | -0.5         | -0.1         | -1.3         | 0            | -1.8         |
| 2        | -x, y+1/2, -z | 13.53    | B3LYP/6-31G(d,p)        | -0.5         | -0.1         | -1.1         | 0            | -1.6         |
| 2        | -x, y+1/2, -z | 14.16    | B3LYP/6-31G(d,p)        | -1           | 0            | -0.5         | 0            | -1.5         |
| 2        | x, y, z       | 13.61    | B3LYP/6-31G(d,p)        | -0.7         | 0            | -0.2         | 0            | -0.9         |
| 2        | -x, y+1/2, -z | 14.88    | B3LYP/6-31G(d,p)        | -0.4         | 0            | -0.3         | 0            | -0.6         |
| 2        | -x, y+1/2, -z | 13.71    | B3LYP/6-31G(d,p)        | 0            | 0            | -0.6         | 0            | -0.5         |
| 2        | -x, y+1/2, -z | 16.1     | B3LYP/6-31G(d,p)        | -0.3         | 0            | -0.1         | 0            | -0.4         |
| 2        | x, y, z       | 13.27    | B3LYP/6-31G(d,p)        | 0            | 0            | -0.2         | 0            | -0.3         |
| 2        | -x, y+1/2, -z | 15.69    | B3LYP/6-31G(d,p)        | -0.1         | 0            | -0.2         | 0            | -0.3         |
| 2        | -x, y+1/2, -z | 17.22    | B3LYP/6-31G(d,p)        | -0.2         | 0            | -0.1         | 0            | -0.3         |
| 2        | -x, y+1/2, -z | 13.35    | B3LYP/6-31G(d,p)        | 0.4          | 0            | -0.7         | 0            | -0.2         |
| 2        | -x, y+1/2, -z | 16.35    | B3LYP/6-31G(d,p)        | -0.1         | 0            | -0.1         | 0            | -0.2         |
| 2        | -x, y+1/2, -z | 17.31    | B3LYP/6-31G(d,p)        | -0.1         | 0            | -0.1         | 0            | -0.2         |
| 2        | x, y, z       | 12.63    | B3LYP/6-31G(d,p)        | 0.1          | 0            | -0.2         | 0            | -0.1         |
| 2        | -x, y+1/2, -z | 16.11    | B3LYP/6-31G(d,p)        | 0            | 0            | -0.1         | 0            | -0.1         |
| 2        | -x, y+1/2, -z | 16.32    | B3LYP/6-31G(d,p)        | 0            | 0            | -0.1         | 0            | -0.1         |
| 2        | -x, y+1/2, -z | 17.6     | B3LYP/6-31G(d,p)        | -0.1         | 0            | -0.1         | 0            | -0.1         |
| 2        | -x, y+1/2, -z | 17.68    | B3LYP/6-31G(d,p)        | -0.1         | 0            | -0.1         | 0            | -0.1         |
| 2        | x, y, z       | 12.07    | B3LYP/6-31G(d,p)        | 0.3          | 0            | -0.4         | 0            | 0            |
| 2        | x, y, z       | 12.83    | B3LYP/6-31G(d,p)        | 0.2          | 0            | -0.2         | 0            | 0            |
| 2        | -x, y+1/2, -z | 15.92    | B3LYP/6-31G(d,p)        | 0.1          | 0            | -0.1         | 0            | 0            |
| 2        | x, y, z       | 14.76    | B3LYP/6-31G(d,p)        | 0.1          | 0            | -0.1         | 0            | 0.1          |
| 2        | -x, y+1/2, -z | 14.09    | B3LYP/6-31G(d,p)        | 0.5          | 0            | -0.3         | 0            | 0.2          |
|          |               |          |                         |              |              |              |              | -74          |

**Table S10. Geometric characteristics of stronger hydrogen bondings**

| Crystal Structure |                | Angle (°) | H···N (Å) | N···N (Å) | H-N (Å) |
|-------------------|----------------|-----------|-----------|-----------|---------|
| <b>5b</b>         | N122-H122-N129 | 162(5)    | 2.07      | 2.885     | 0.84    |
|                   |                | Angle (°) | H···O (Å) | N···O (Å) | H-N (Å) |
| <b>9b</b>         | N29-H29-O2     | 173(4)    | 2.05      | 2.820     | 0.77    |

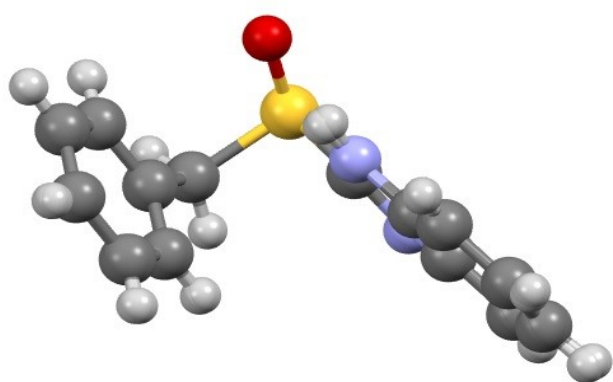

**Figure S9.** Overlap between the inverted reported crystal structure of “racemic” **5b** with (*R*)-**5b** synthesised in the present work.

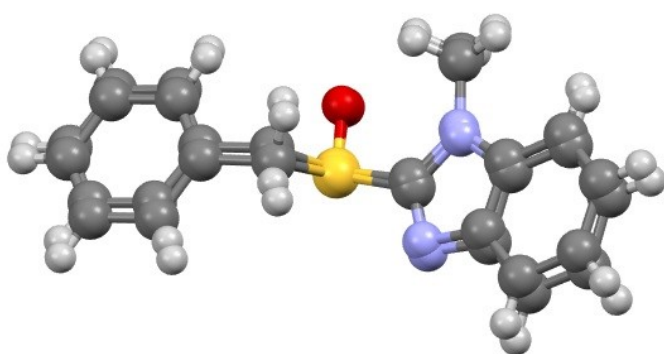

**Figure S10.** Overlap between the inverted reported crystal structure of (*R*)-**10b** with the “racemic” sample synthesised in the present work.

## Graphical Reports of spectral data

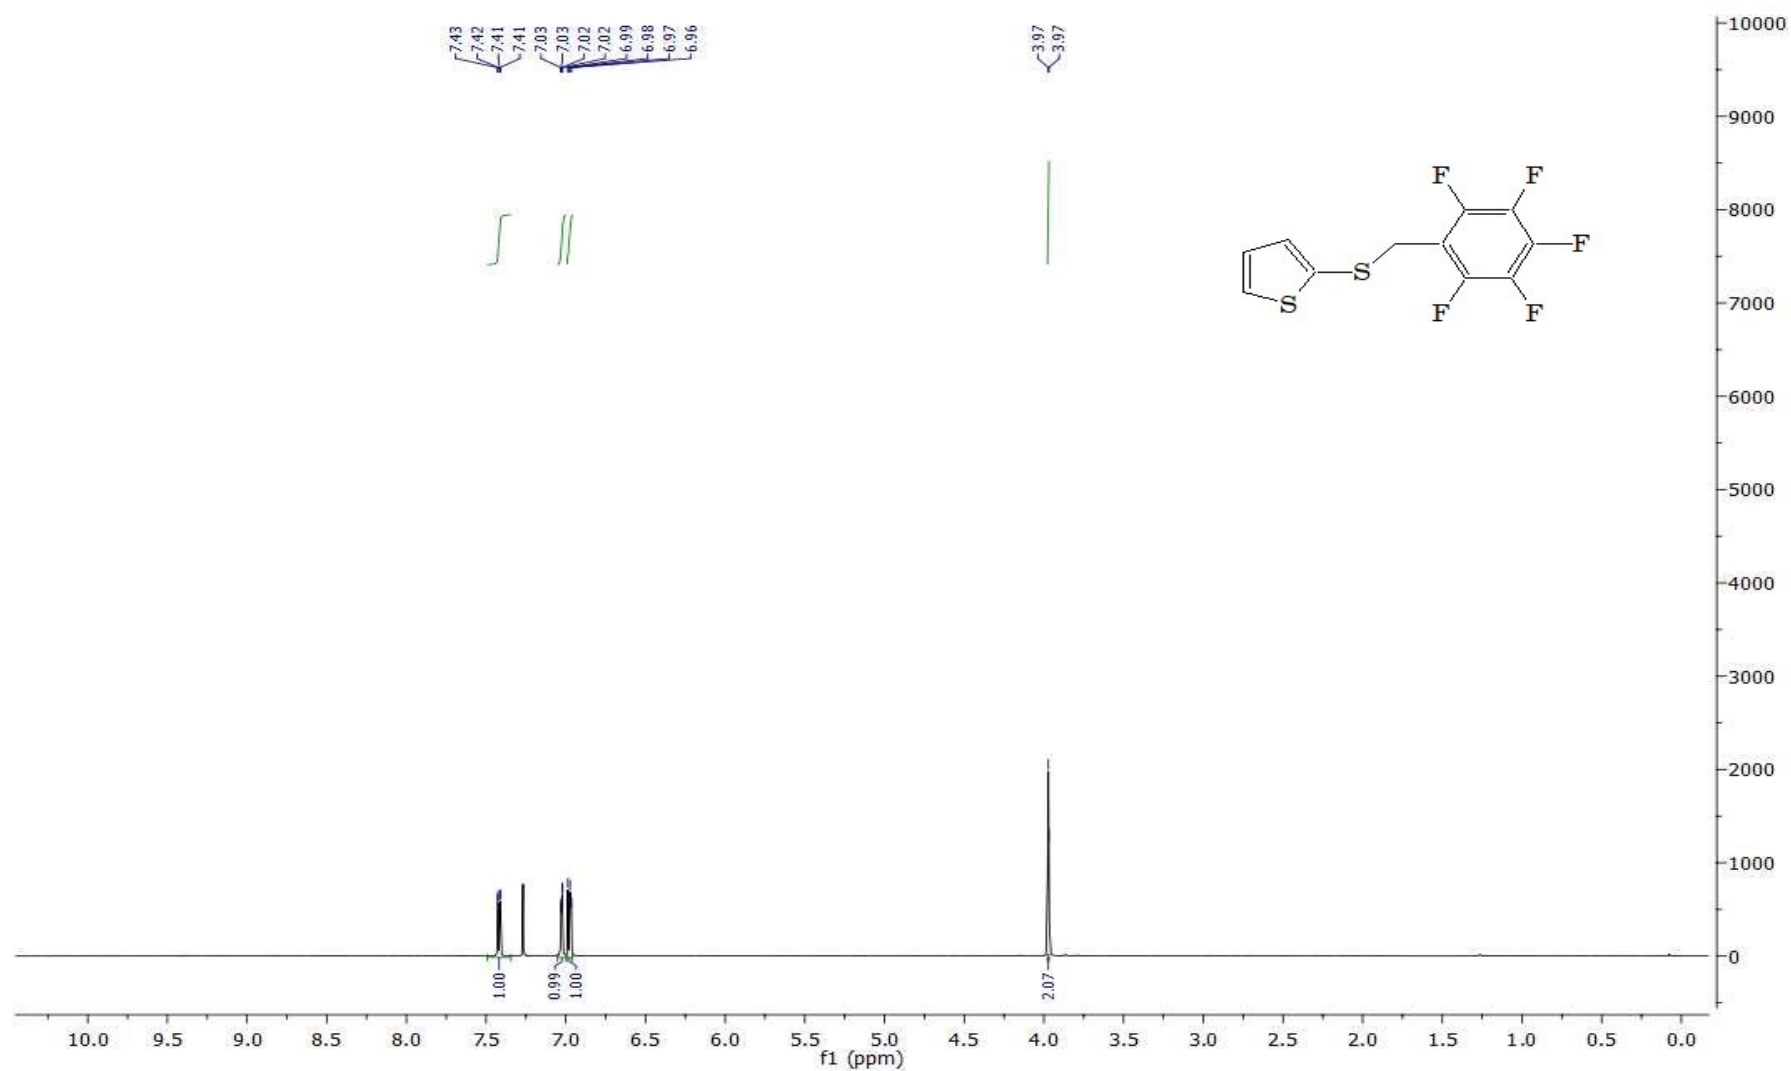

**Figure S11.** 400 MHz <sup>1</sup>H-NMR spectrum of (*R*)-2-(2,3,4,5,6-pentafluorobenzylthio)thiophene **2a**.



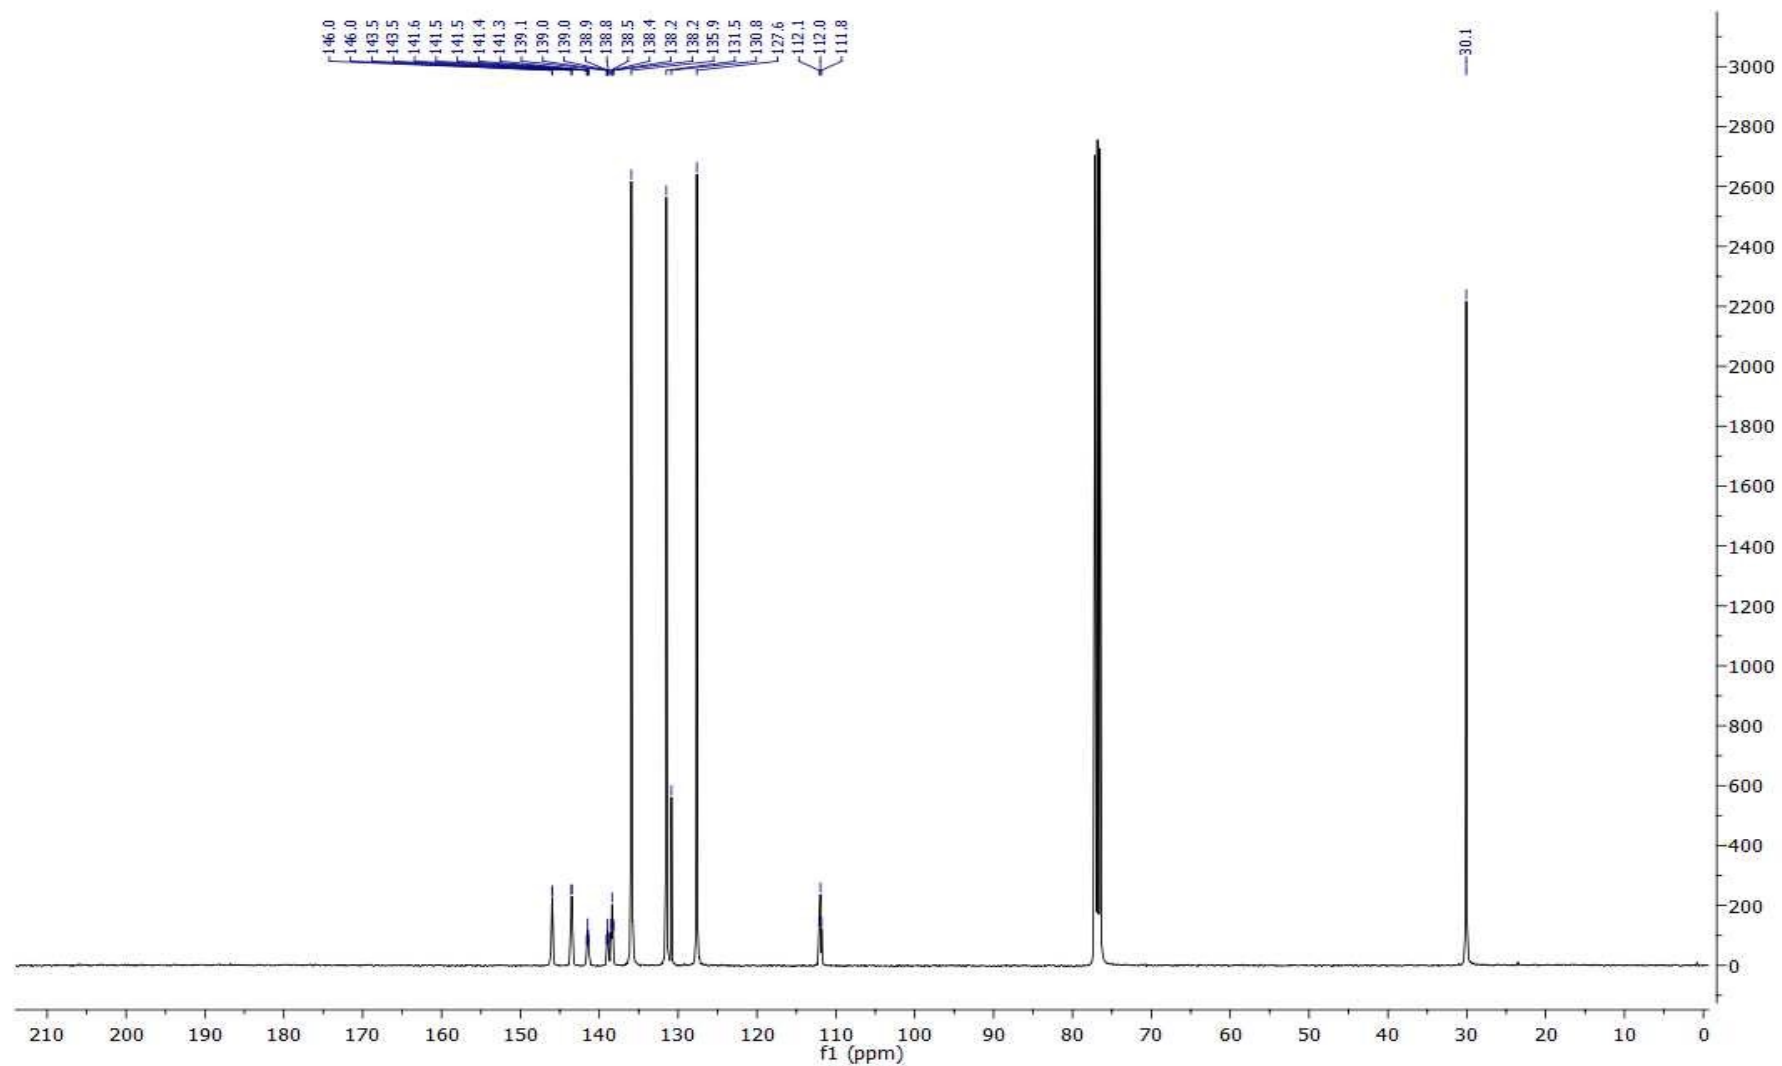

**Figure S12.** 100 MHz <sup>13</sup>C-NMR spectrum of (*R*)-2-(2,3,4,5,6-pentafluorobenzylthio)thiophene **2a**.

| Sample Name   | Position    | Instrument Name | User Name              |
|---------------|-------------|-----------------|------------------------|
| Inj Vol       | InjPosition | SampleType      | IRM Calibration Status |
| Data Filename | ACQ Method  | Comment         | Acquired Time          |

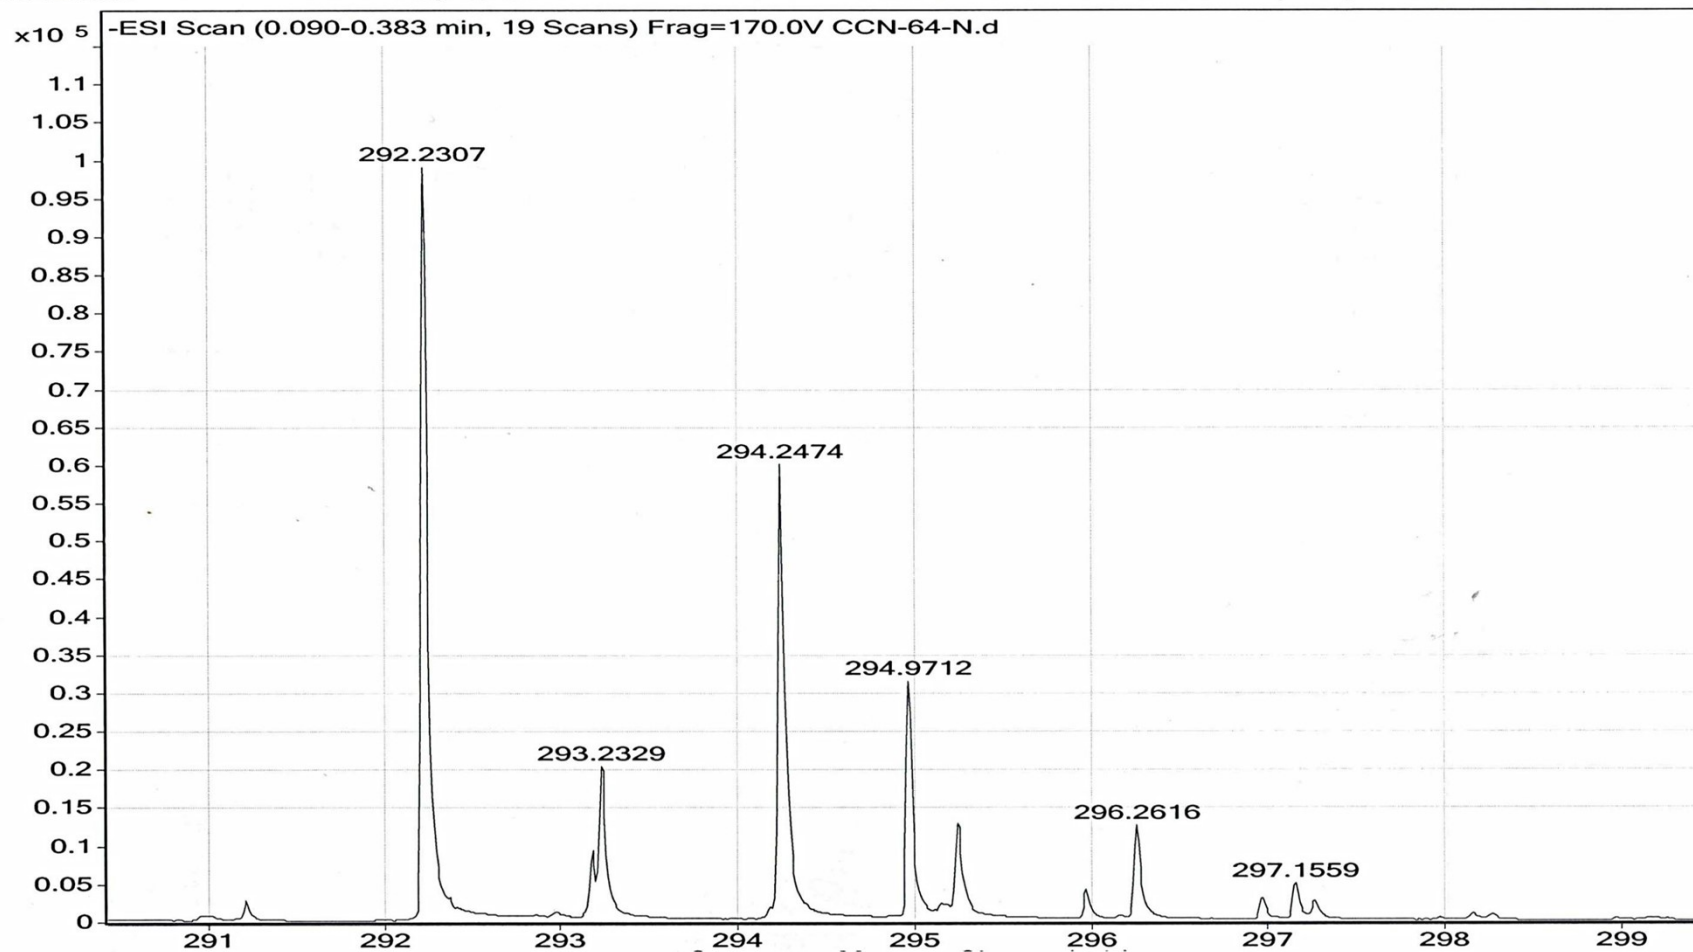

Figure S13. QTOF MS spectrum of (*R*)-2-(2,3,4,5,6-pentafluorobenzylthio)thiophene **2a**.

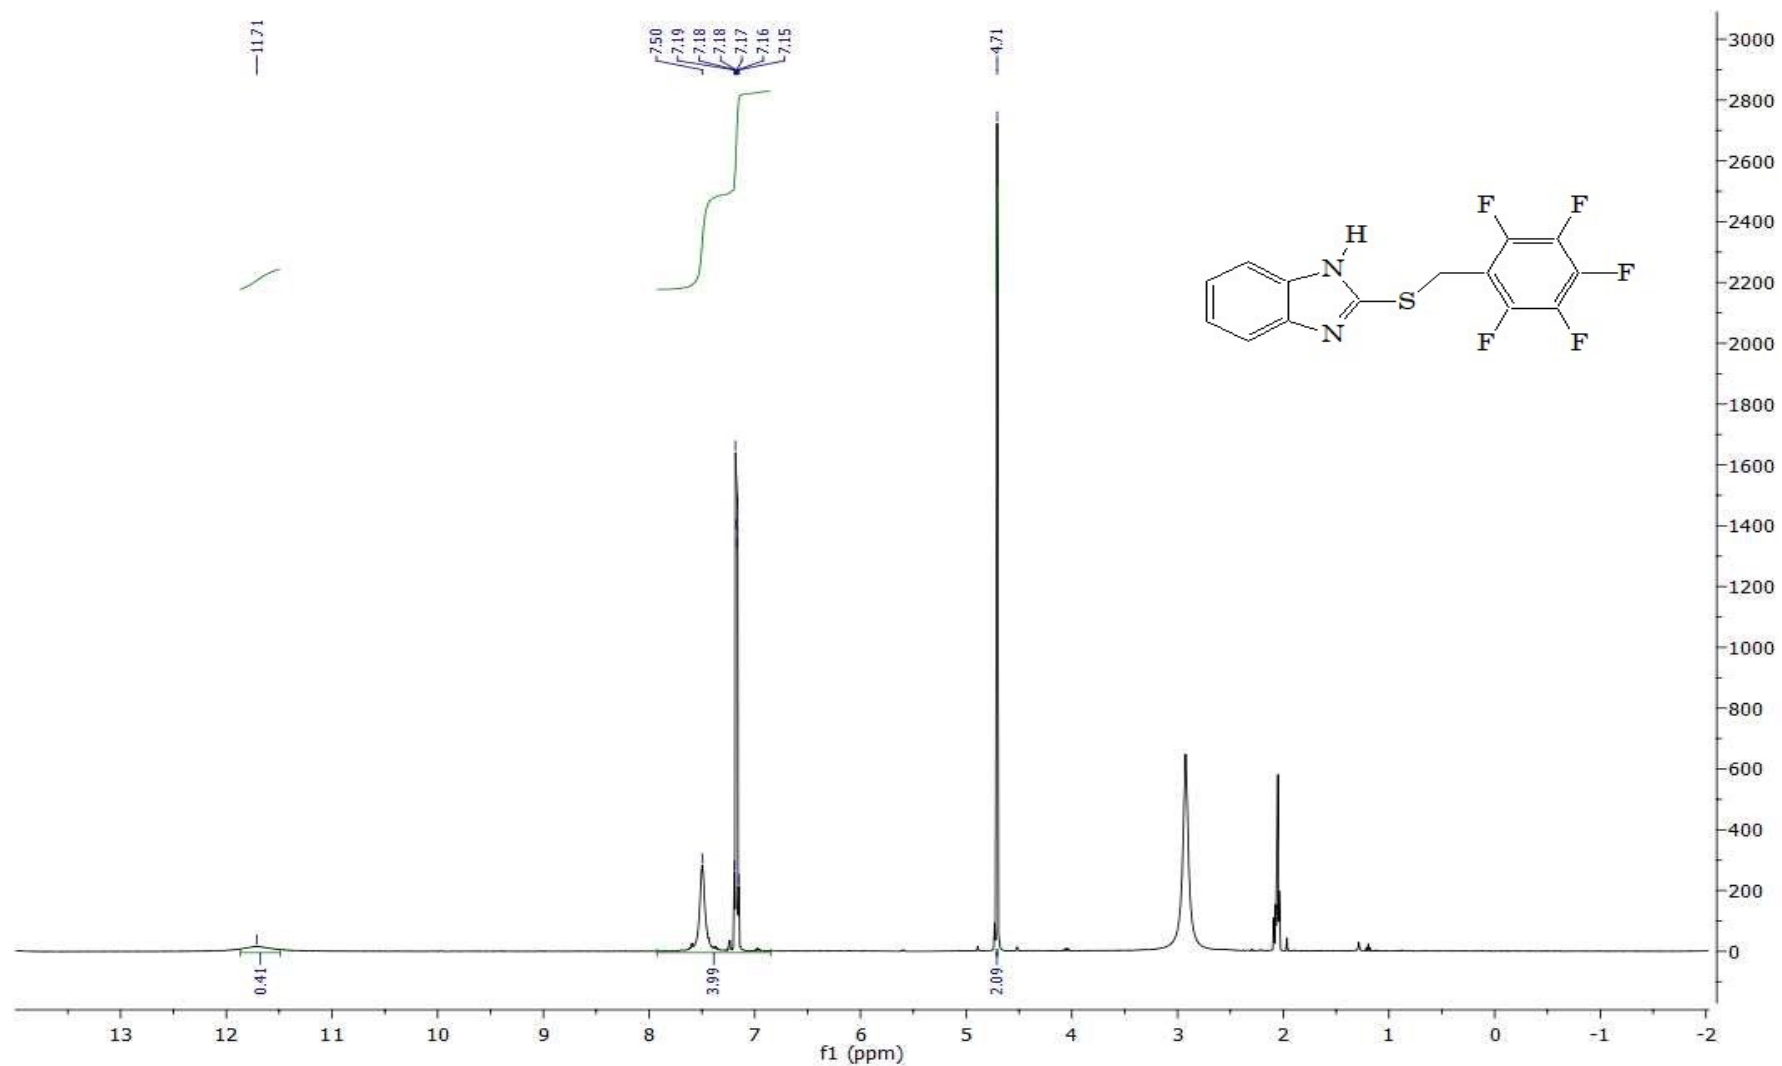

**Figure S14.** 400 MHz <sup>1</sup>H-NMR spectrum of 2-(2,3,4,5,6-pentafluorobenzylthio)-1H-benzo[d]imidazole **9a**.

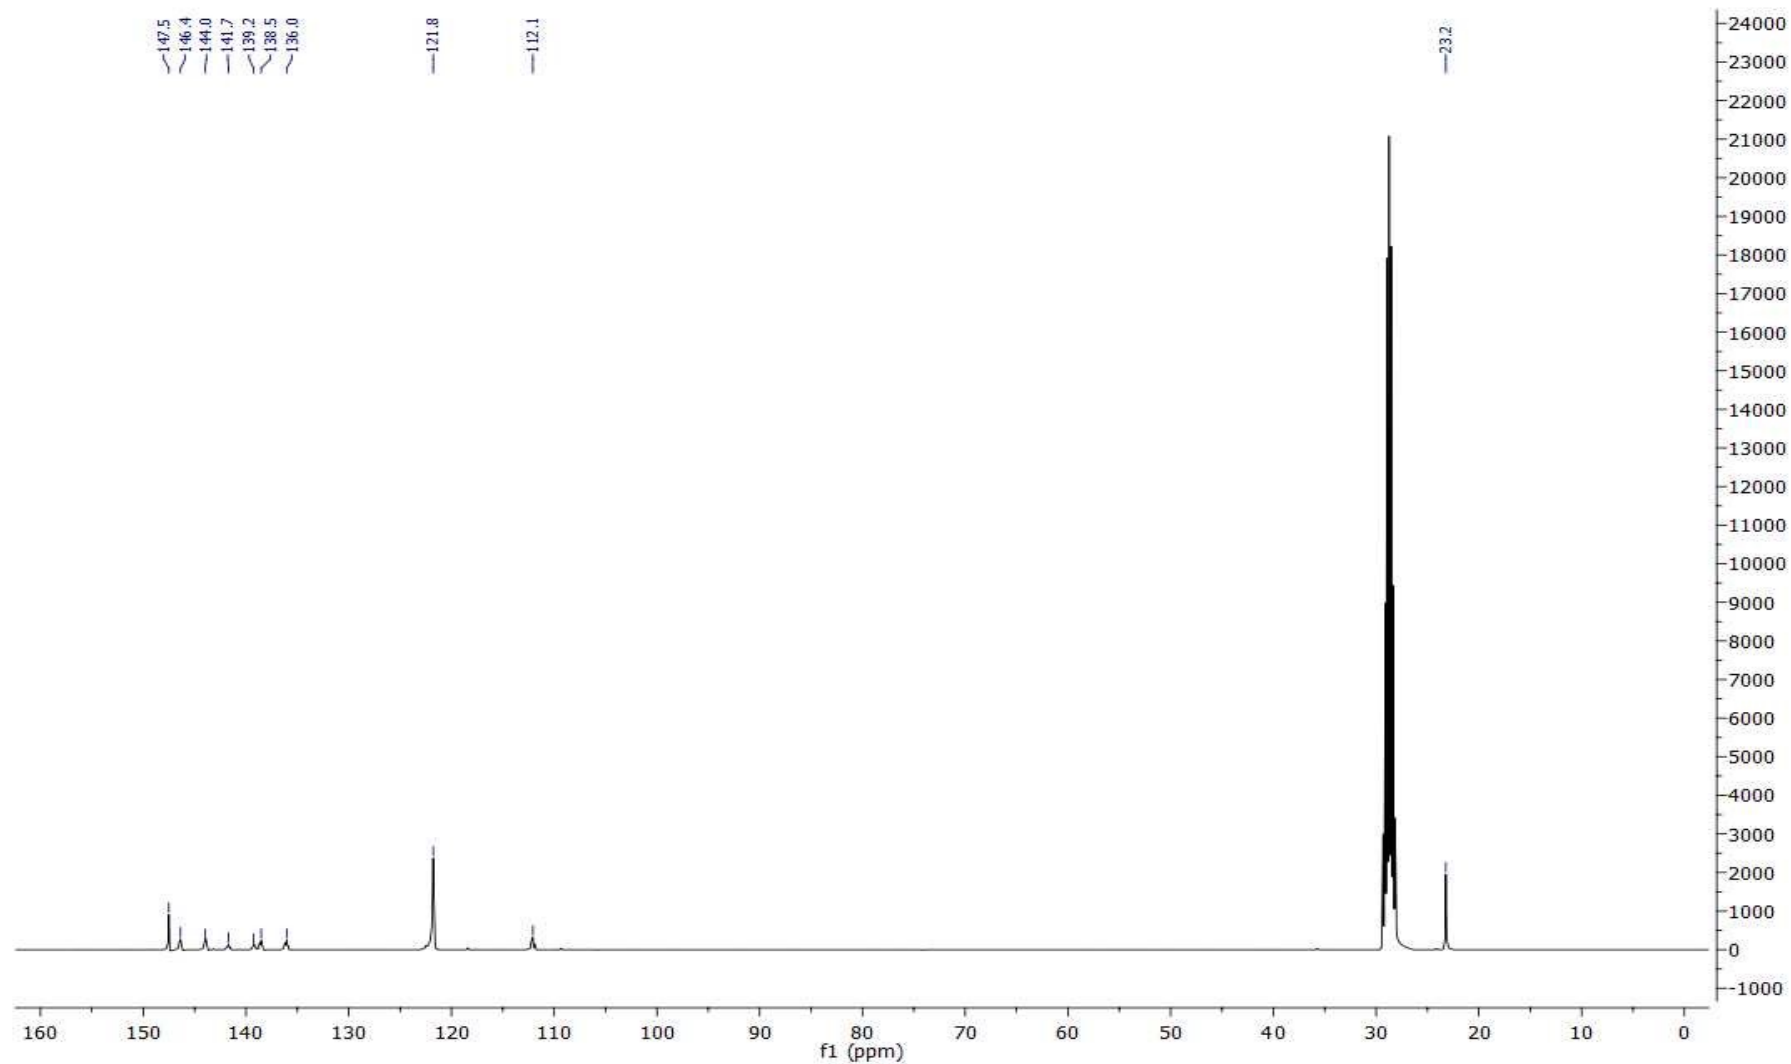

**Figure S15.** 100 MHz <sup>13</sup>C-NMR spectrum of 2-(2,3,4,5,6-pentafluorobenzylthio)-1H-benzo[d]imidazole **9a**.

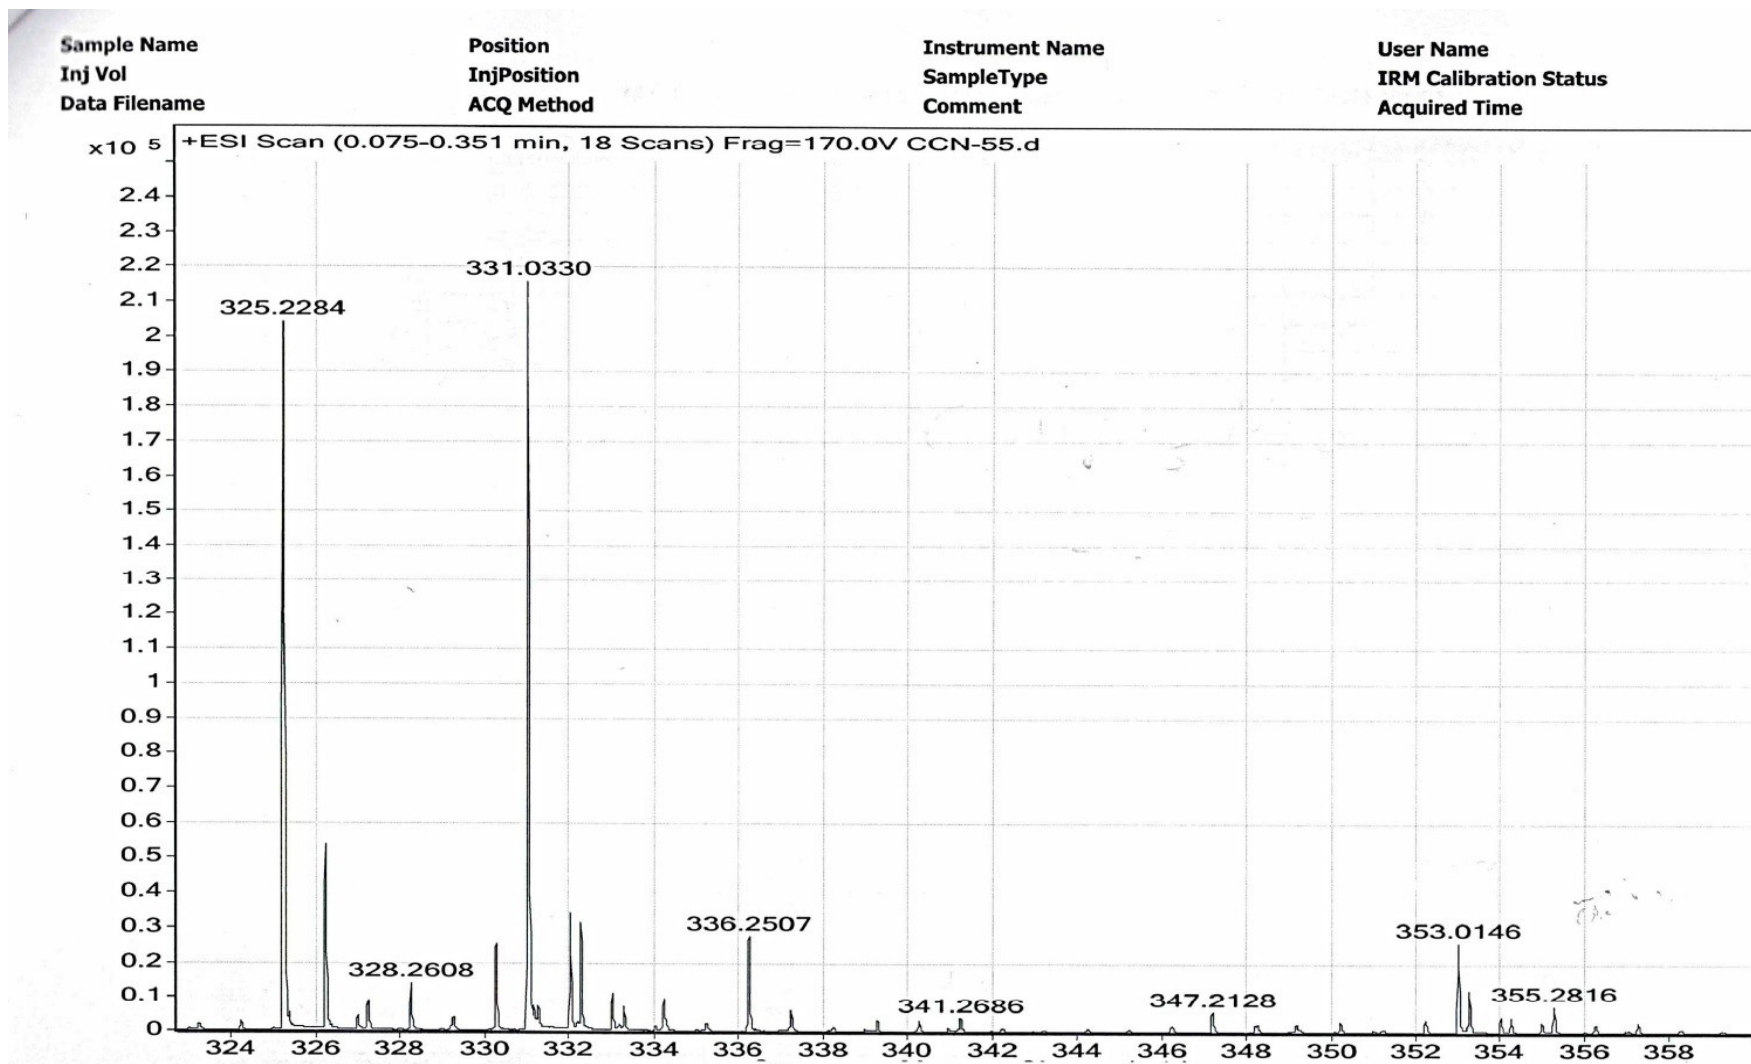

Figure S16. QTOF MS spectrum of 2-(2,3,4,5,6-pentafluorobenzylthio)-1H-benzo[d]imidazole **9a**.

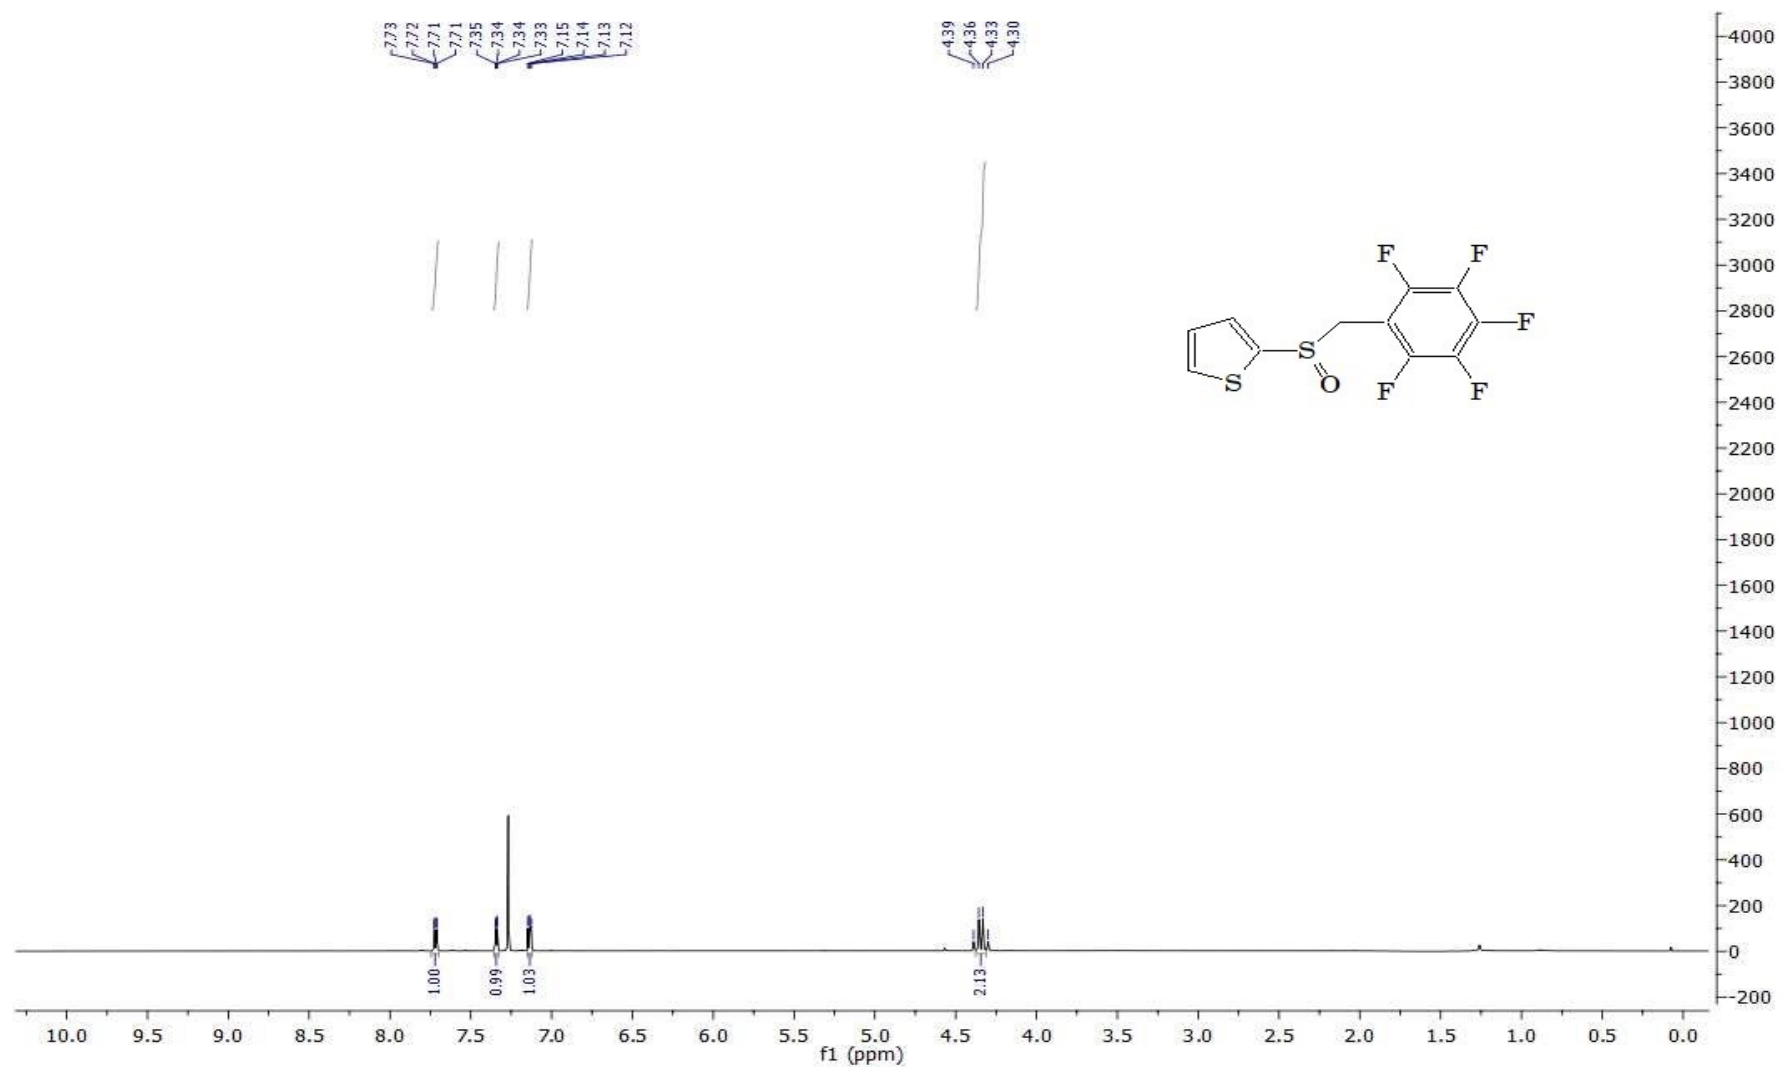

**Figure S17.** 400 MHz <sup>1</sup>H-NMR spectrum of of (*R*)-2-(2,3,4,5,6-pentafluorobenzylsulfinyl)thiophene **2b**

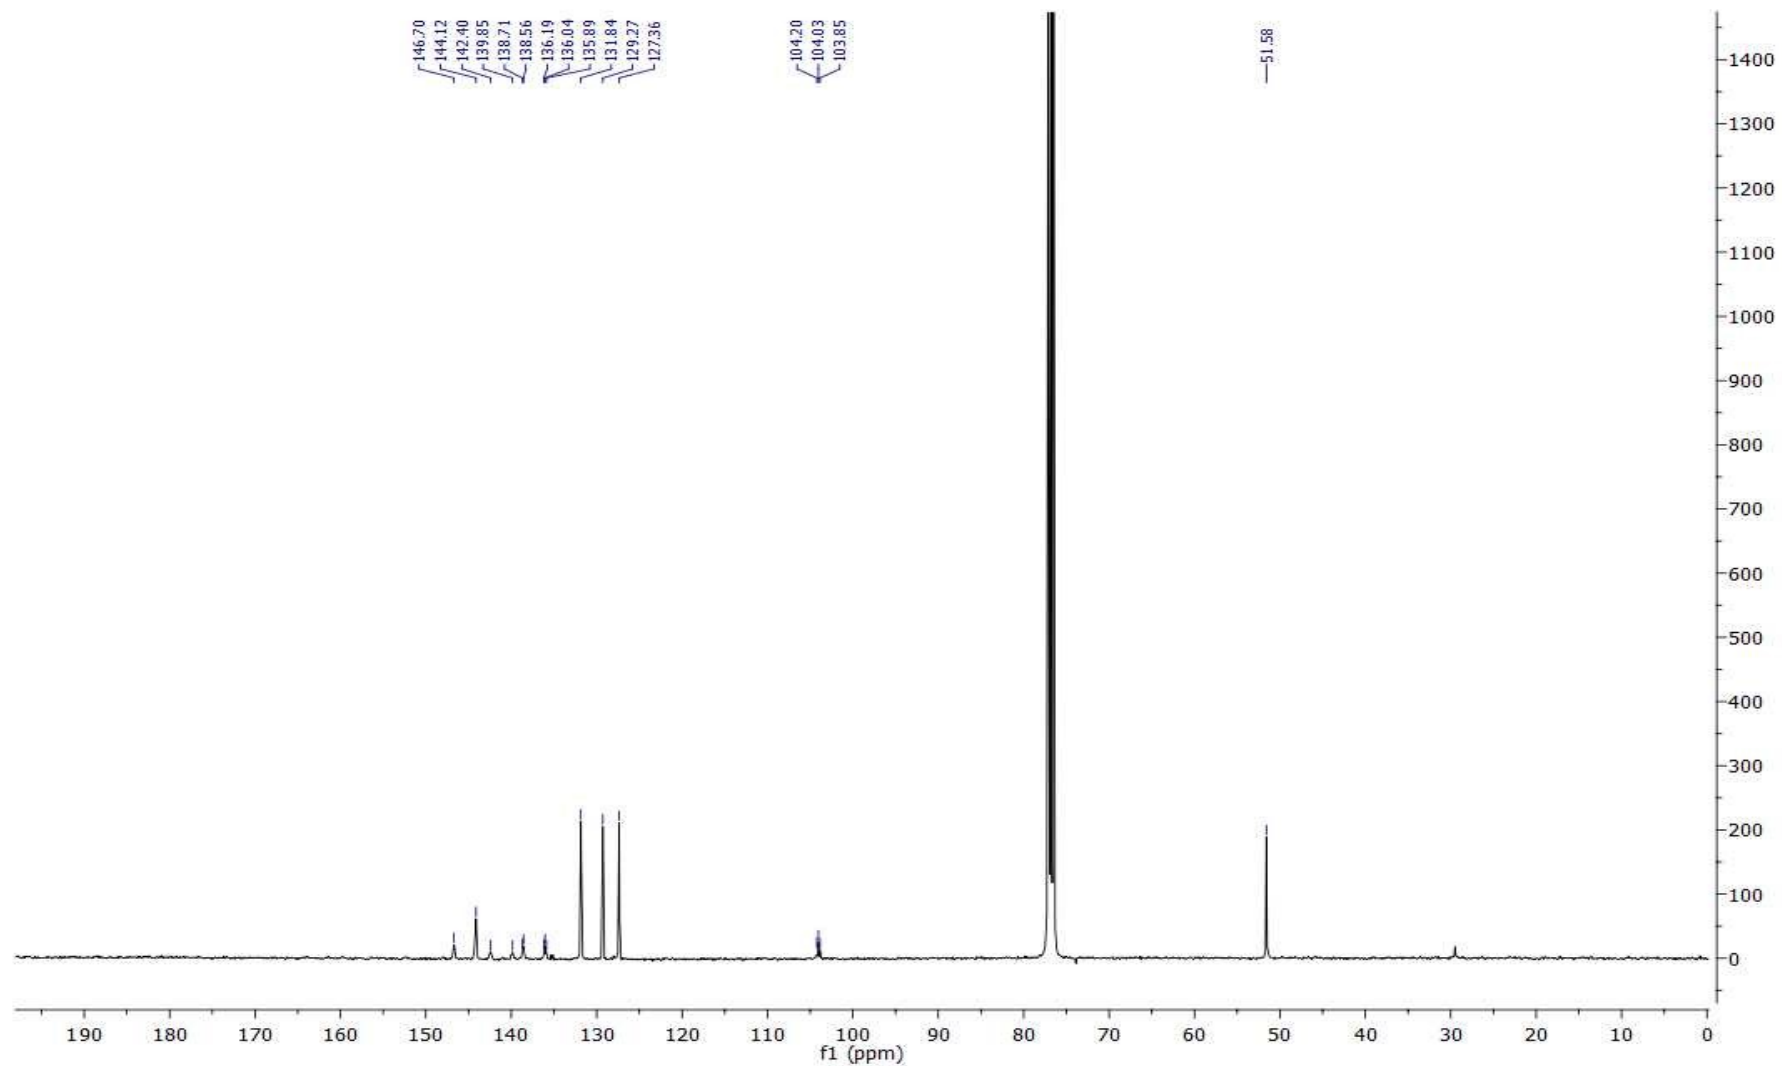

**Figure S18.** 100 MHz  $^{13}\text{C}$ -NMR spectrum of (*R*)-2-(2,3,4,5,6-pentafluorobenzylsulfinyl)thiophene **2b**

| Sample Name   | Position    | Instrument Name | User Name              |
|---------------|-------------|-----------------|------------------------|
| Inj Vol       | InjPosition | SampleType      | IRM Calibration Status |
| Data Filename | ACQ Method  | Comment         | Acquired Time          |

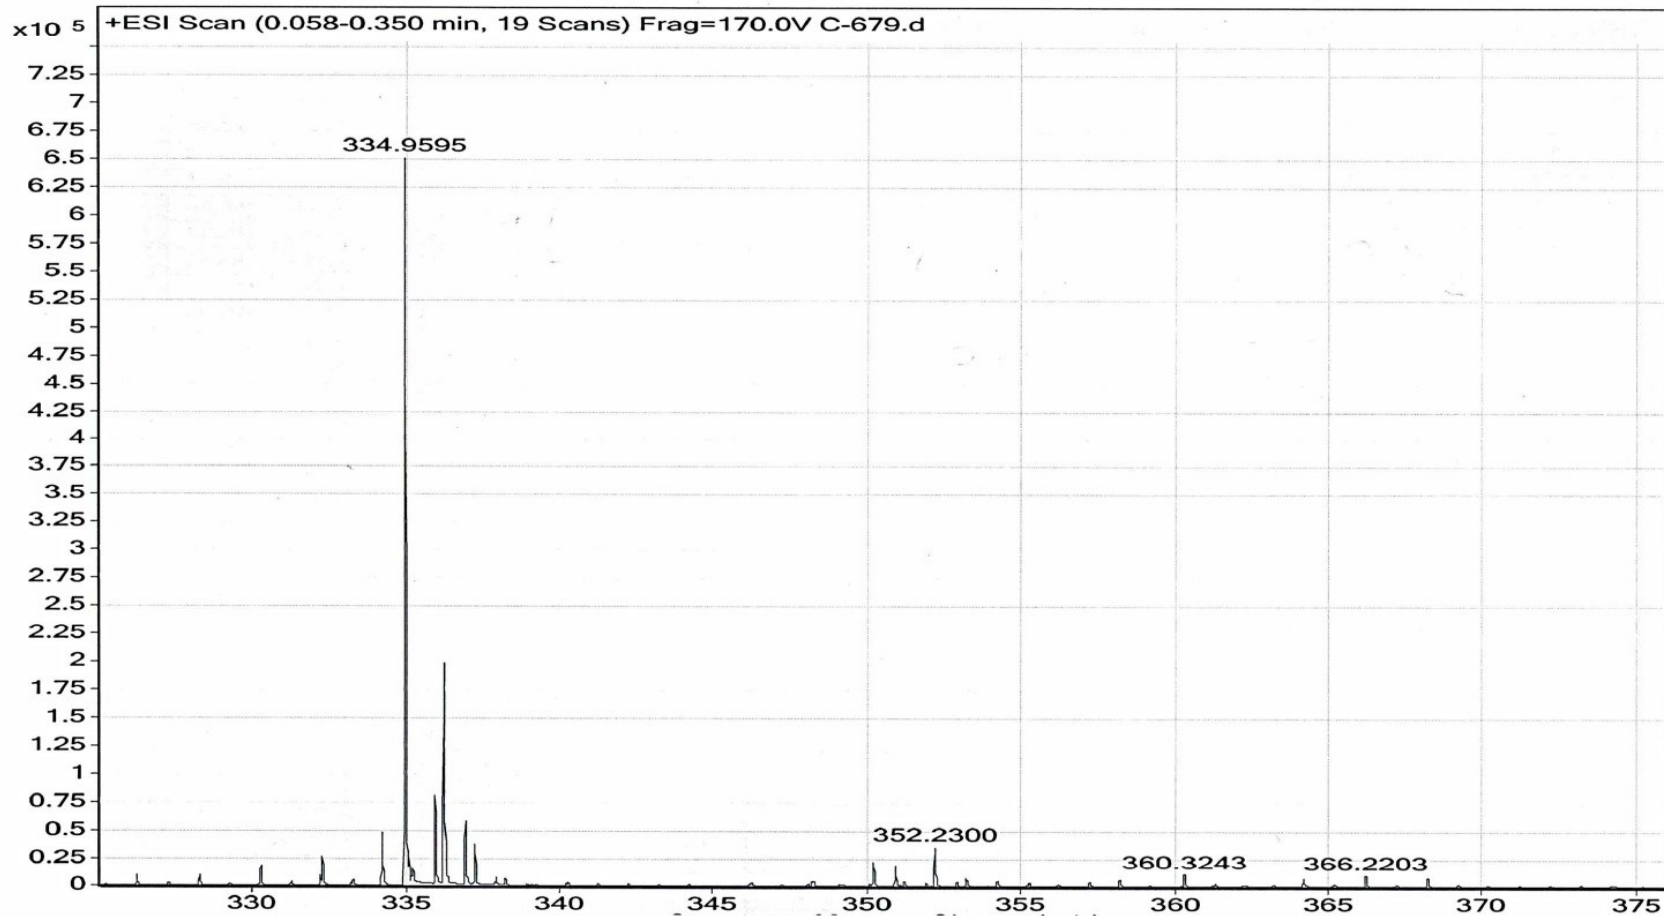

Figure S19 QTOF MS spectrum of (*R*)-2-(2,3,4,5,6-pentafluorobenzylsulfinyl)thiophene **2b**



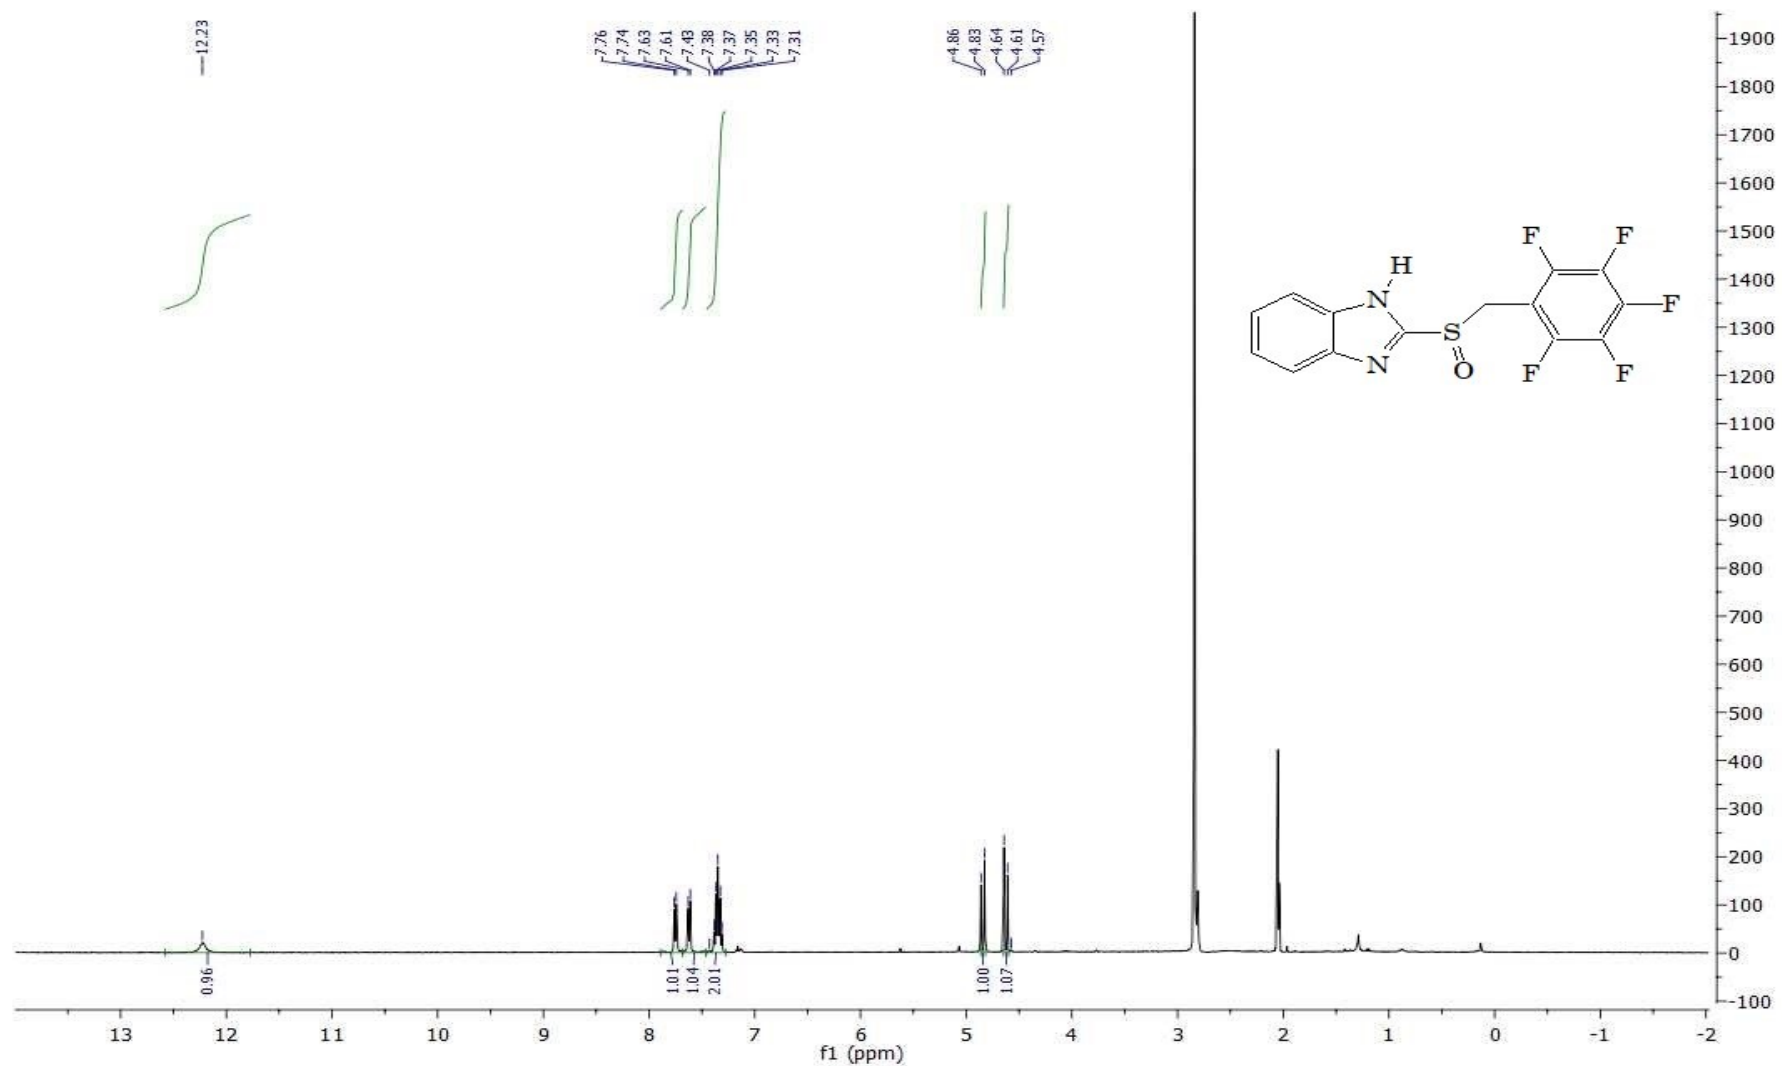

**Figure S20.** 400 MHz <sup>1</sup>H-NMR spectrum of 2-(2,3,4,5,6-pentafluorobenzylsulfinyl)-1H-benzo[d]imidazole **9b**.

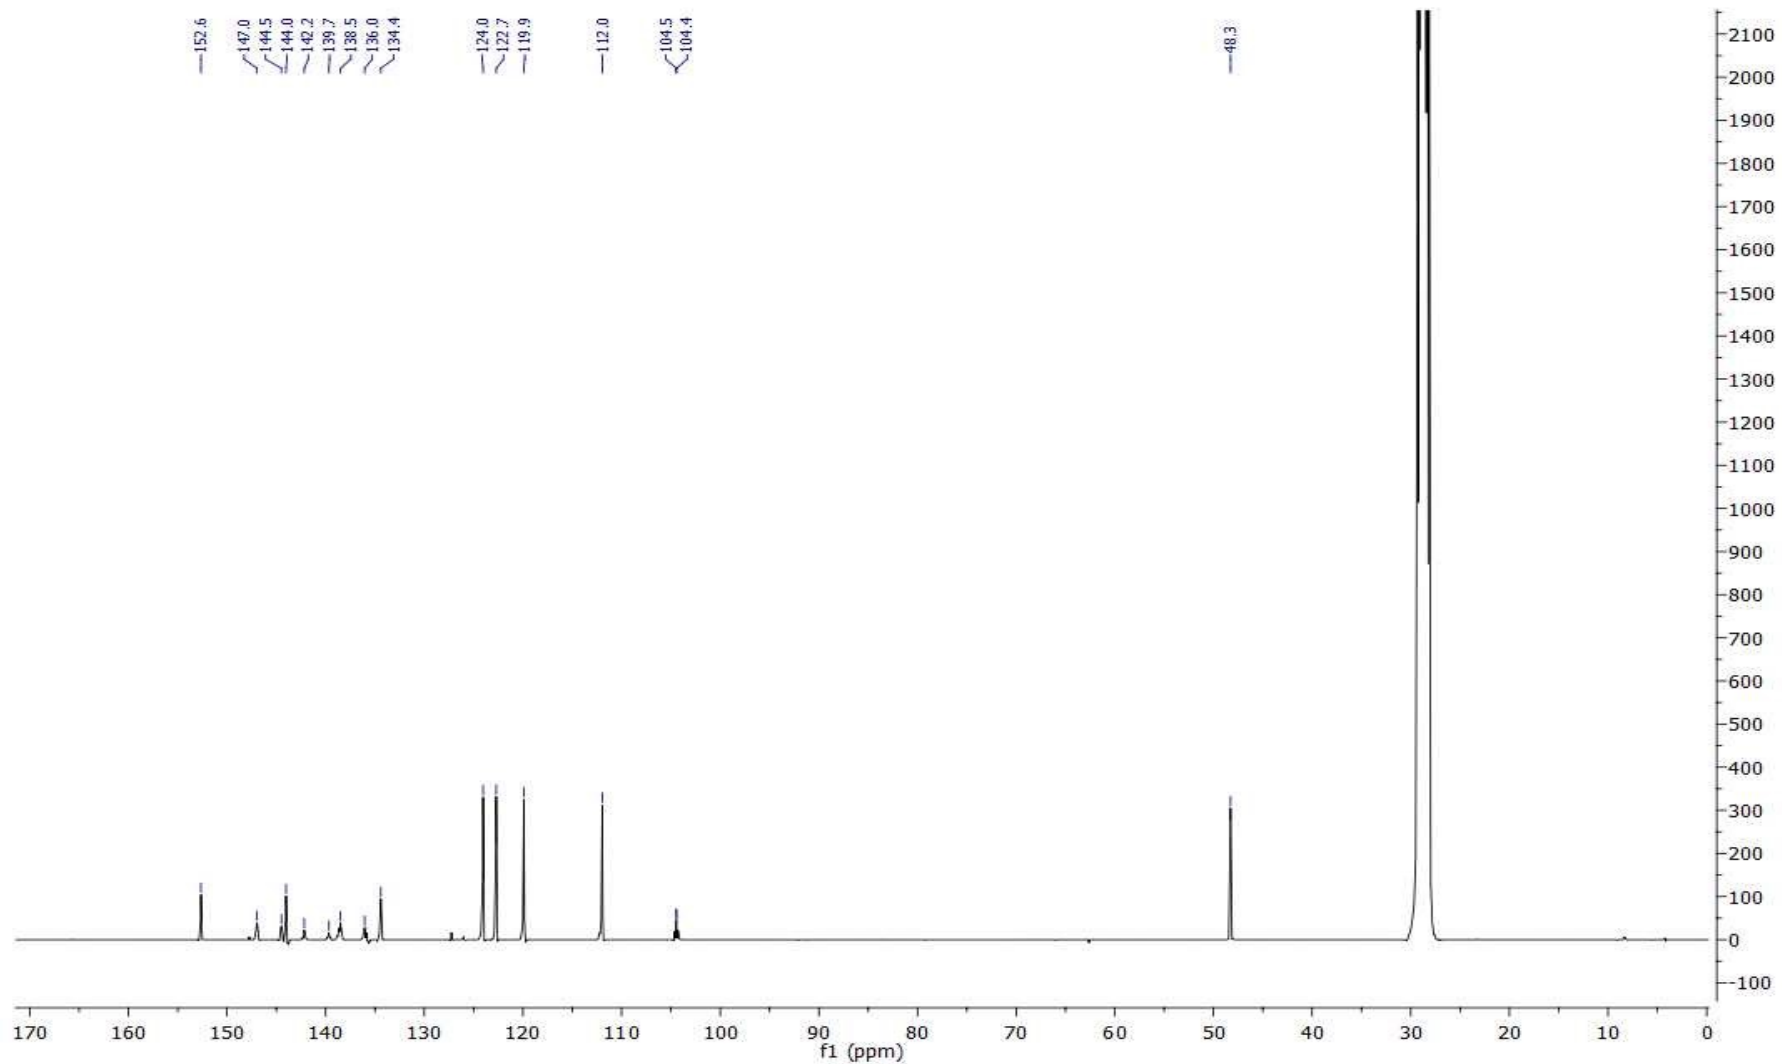

**Figure S21.** 100 MHz  $^{13}\text{C}$ -NMR spectrum of 2-(2,3,4,5,6-pentafluorobenzylsulfinyl)-1H-benzo[d]imidazole **9b**.

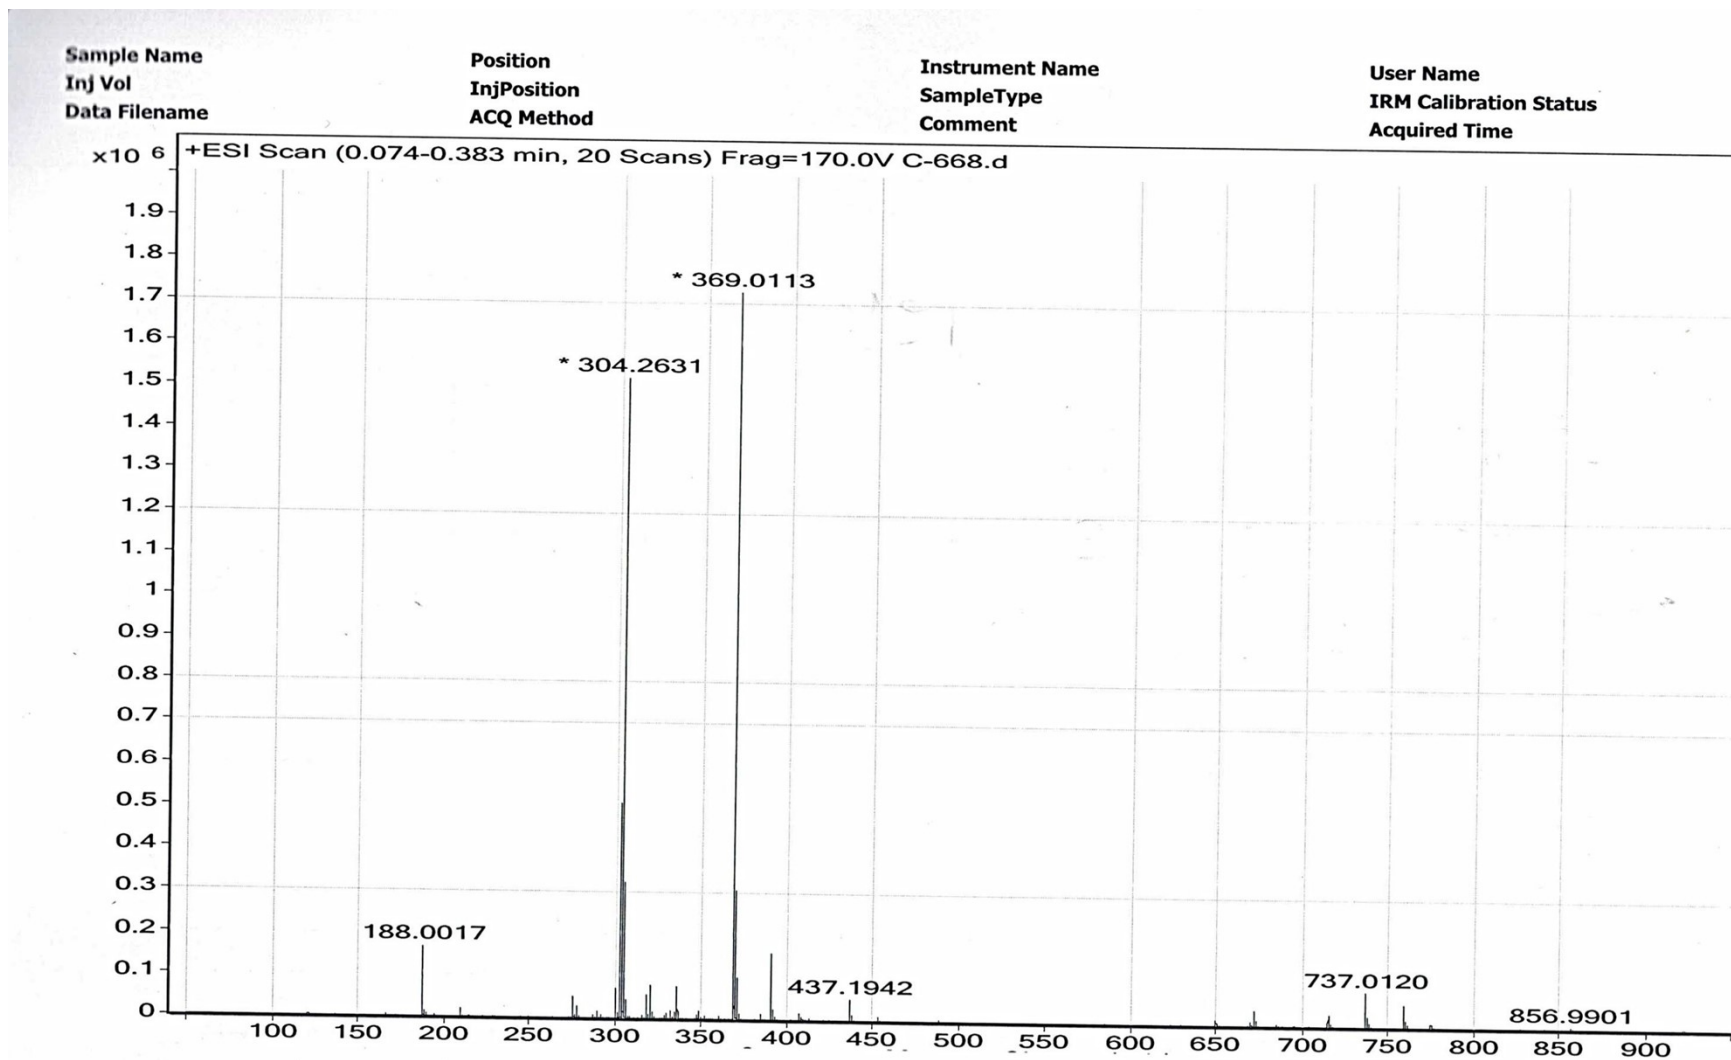

**Figure S22.** QTOF MS spectrum of 2-(2,3,4,5,6-pentafluorobenzylsulfinyl)-1H-benzo[d]imidazole **9b**.

ccn70bis ThSOCH2Ph racemico  
Chiralcel OD-H esano:IPA 80:20 0.5 ml/min

```
=====
Injection Date   : 9/29/2022 10:47:14 AM
Sample Name     : ThSOCH2Ph_rac           Location : Vial 1
Acq. Operator   : Mimmo
Acq. Method     : C:\HPCHEM\1\METHODS\ESANOIPA.M
Last changed    : 9/29/2022 8:34:43 AM by Mimmo
                  (modified after loading)
Analysis Method : C:\HPCHEM\1\METHODS\ESANOIPA.M
Last changed    : 10/11/2024 4:53:07 PM by Mimmo
=====
```

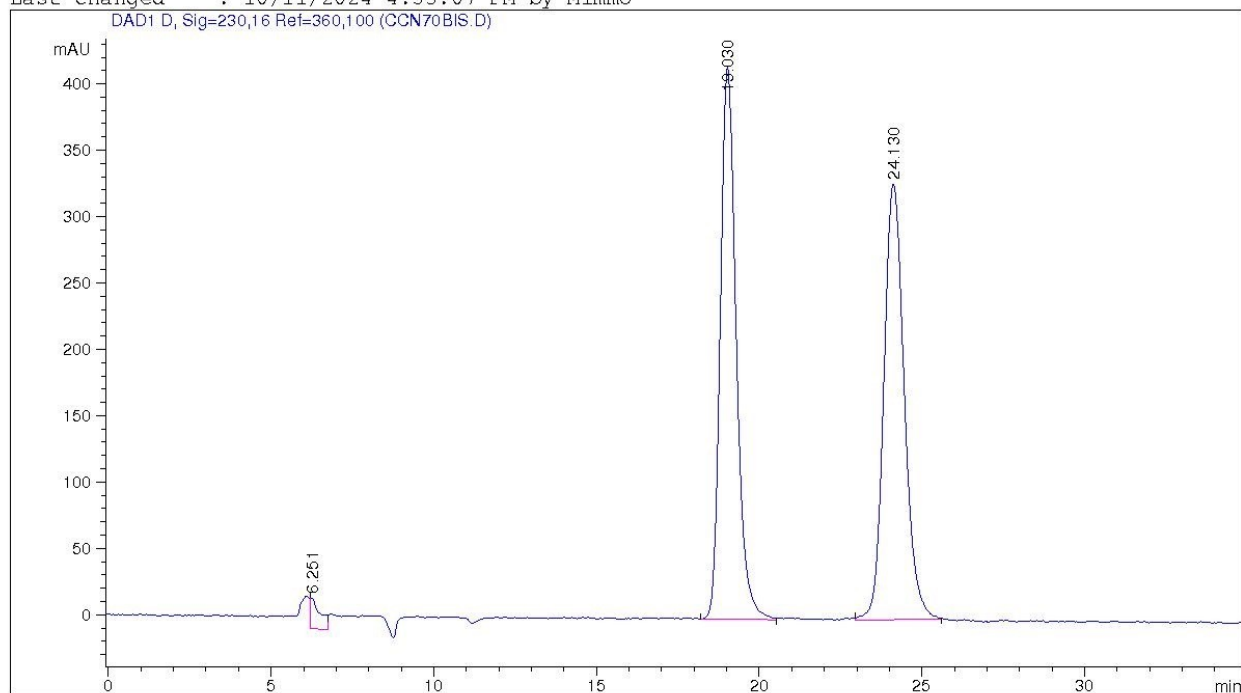

```
=====
Area Percent Report
=====
```

```
Sorted By      :      Signal
Multiplier     :      1.0000
Dilution       :      1.0000
```

Signal 1: DAD1 D, Sig=230,16 Ref=360,100

| Peak # | RetTime [min] | Type | Width [min] | Area [mAU*s] | Height [mAU] | Area %  |
|--------|---------------|------|-------------|--------------|--------------|---------|
| 1      | 6.251         | VB   | 0.2851      | 485.30112    | 22.72493     | 1.6788  |
| 2      | 19.030        | VB   | 0.5201      | 1.41173e4    | 415.81421    | 48.8349 |
| 3      | 24.130        | VB   | 0.6686      | 1.43056e4    | 328.18442    | 49.4863 |

Totals :                    2.89081e4    766.72356

Results obtained with enhanced integrator!

```
=====
*** End of Report ***
=====
```

**Figure S23.** HPLC of racemic 2-(Benzylsulfinyl)thiophene **1b**.

c608 ThSOCH2Ph chirale  
Chiralcel OD-H esano:IPA 80:20 0.5 ml/min

```

=====
Injection Date   : 9/29/2022 11:24:03 AM
Sample Name     : ThSOCH2Ph_ch           Location  : Vial 1
Acq. Operator   : Mimmo
Acq. Method    : C:\HPCHEM\1\METHODS\ESANOIPA.M
Last changed    : 9/29/2022 8:34:43 AM by Mimmo
                  (modified after loading)
Analysis Method : C:\HPCHEM\1\METHODS\ESANOIPA.M
Last changed    : 10/11/2024 4:53:07 PM by Mimmo
=====
  
```

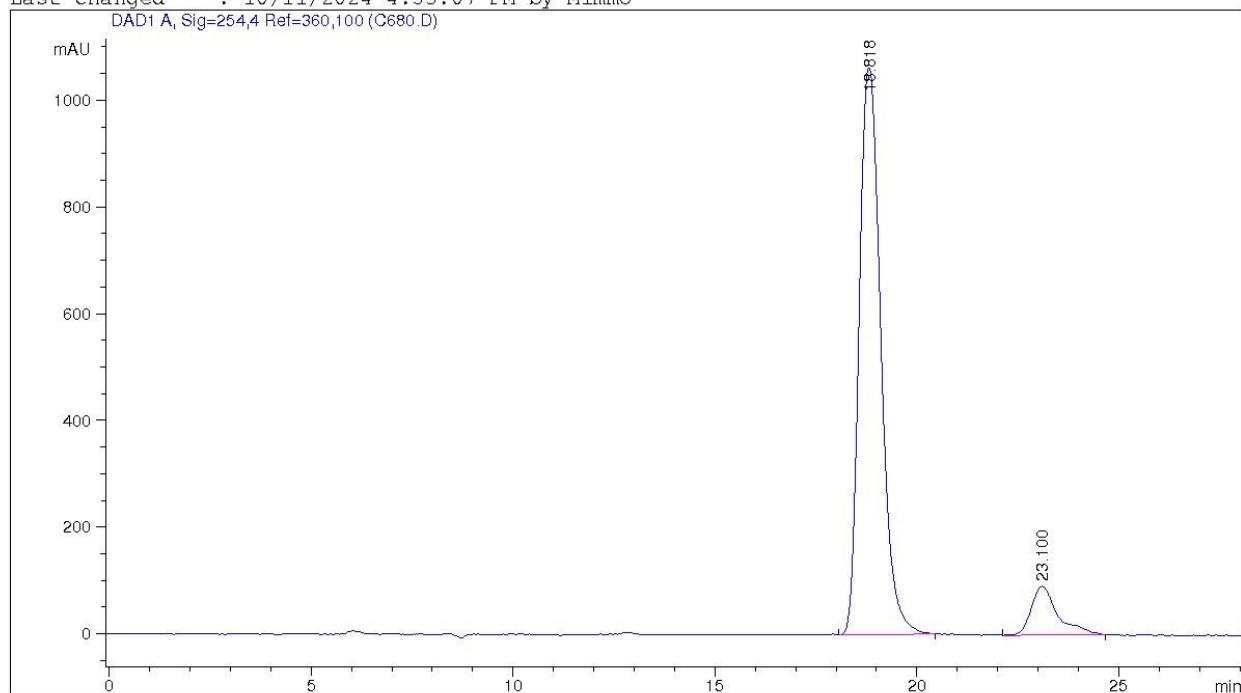

```

=====
                          Area Percent Report
=====
  
```

```

Sorted By      :      Signal
Multiplier     :      1.0000
Dilution       :      1.0000
  
```

Signal 1: DAD1 A, Sig=254,4 Ref=360,100

| Peak # | RetTime [min] | Type | Width [min] | Area [mAU*s] | Height [mAU] | Area %  |
|--------|---------------|------|-------------|--------------|--------------|---------|
| 1      | 18.818        | VB   | 0.5847      | 3.94050e4    | 1062.47437   | 90.4178 |
| 2      | 23.100        | VB   | 0.6446      | 4176.01660   | 91.47438     | 9.5822  |

Totals :                    4.35810e4  1153.94875

Results obtained with enhanced integrator!

```

=====
*** End of Report ***
  
```

**Figure S24.** HPLC of (*R*)-2-(Benzylsulfinyl)thiophene **1b**.

CCN69 2-ThiophSOCH2C6F5 verifica  
Chiralpak IA n-Esano/i-Propanolo 70:30

```
=====
Injection Date   : 10/11/2024 12:12:20 PM
Sample Name      : ThSOCH2C6F5                Location : Vial 1
Acq. Operator    : Mimmo
Acq. Method      : C:\HPCHEM\1\METHODS\ESANOIPA.M
Last changed     : 10/11/2024 11:41:05 AM by Mimmo
Analysis Method  : C:\HPCHEM\1\METHODS\ESANOIPA.M
Last changed     : 10/11/2024 4:53:07 PM by Mimmo
=====
```

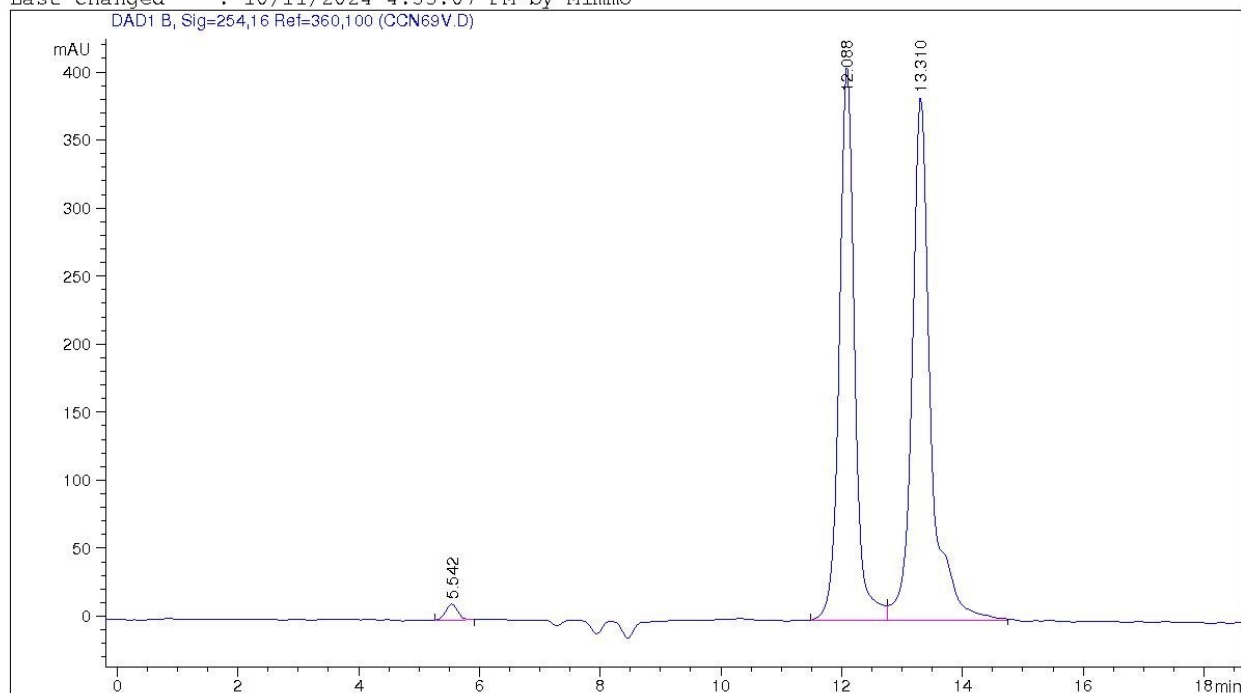

```
=====
                          Area Percent Report
=====
```

```
Sorted By           :      Signal
Multiplier           :      1.0000
Dilution             :      1.0000
```

Signal 1: DAD1 B, Sig=254,16 Ref=360,100

| Peak # | RetTime [min] | Type | Width [min] | Area [mAU*s] | Height [mAU] | Area %  |
|--------|---------------|------|-------------|--------------|--------------|---------|
| 1      | 5.542         | BB   | 0.2206      | 166.62471    | 11.80993     | 1.0688  |
| 2      | 12.088        | BV   | 0.2702      | 7224.01465   | 408.64069    | 46.3375 |
| 3      | 13.310        | VB R | 0.3109      | 8199.34180   | 384.63553    | 52.5937 |

Totals :                    1.55900e4    805.08614

Results obtained with enhanced integrator!

```
=====
*** End of Report ***
=====
```

**Figure S25.** HPLC of racemic 2-(2,3,4,5,6-pentafluorobenzylsulfinyl)thiophene **2b**.

C679 ThienylSOCH2C6F5 cristallizzato  
Chiralpak IA 70:30

```
=====  
Injection Date   : 1/13/2023 10:34:26 AM  
Sample Name     : C679ThienFluorXX           Location : Vial 1  
Acq. Operator   : Mimmo  
Acq. Method     : C:\HPCHEM\1\METHODS\ESANOIPA.M  
Last changed    : 1/13/2023 9:17:48 AM by Mimmo  
                 (modified after loading)  
Analysis Method : C:\HPCHEM\1\METHODS\ESANOIPA.M  
Last changed    : 10/11/2024 4:53:07 PM by Mimmo  
DAD1 A, Sig=254,4 Ref=360,100 (C679TFXX.D)
```

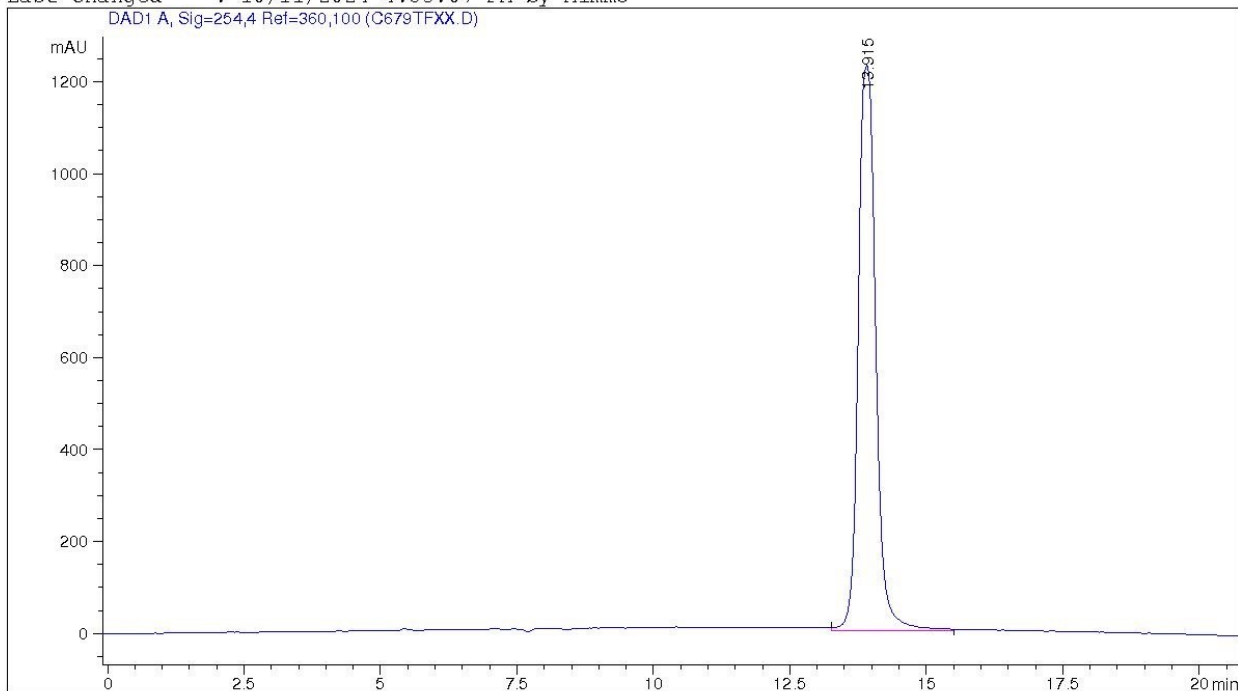

```
=====  
Area Percent Report  
=====
```

```
Sorted By      :      Signal  
Multiplier     :      1.0000  
Dilution       :      1.0000
```

Signal 1: DAD1 A, Sig=254,4 Ref=360,100

| Peak # | RetTime [min] | Type | Width [min] | Area [mAU*s] | Height [mAU] | Area %   |
|--------|---------------|------|-------------|--------------|--------------|----------|
| 1      | 13.915        | VV   | 0.3490      | 2.74959e4    | 1229.25037   | 100.0000 |

Totals :                           2.74959e4 1229.25037

Results obtained with enhanced integrator!

```
=====  
*** End of Report ***
```

**Figure S26.** HPLC of (*R*)-2-(2,3,4,5,6-pentafluorobenzylsulfinyl)thiophene **2b**

IP9 p-Bromofenil SOCH2 2Py racemico  
Chiralcel OD-H esano:IPA 70:30 0.5 ml/min

```
=====  
Injection Date   : 6/18/2019 10:47:04 AM  
Sample Name     : IP9BrPhSOCH2Pyra           Location : Vial 1  
Acq. Operator   : Mimmo  
Acq. Method     : C:\HPCHEM\1\METHODS\ESANOIPA.M  
Last changed    : 6/18/2019 8:52:36 AM by Mimmo  
                 (modified after loading)  
Analysis Method : C:\HPCHEM\1\METHODS\ESANOIPA.M  
Last changed    : 10/11/2024 4:53:07 PM by Mimmo  
DAD1 A, Sig=254,4 Ref=360,100 (IP9PYRA.D)
```

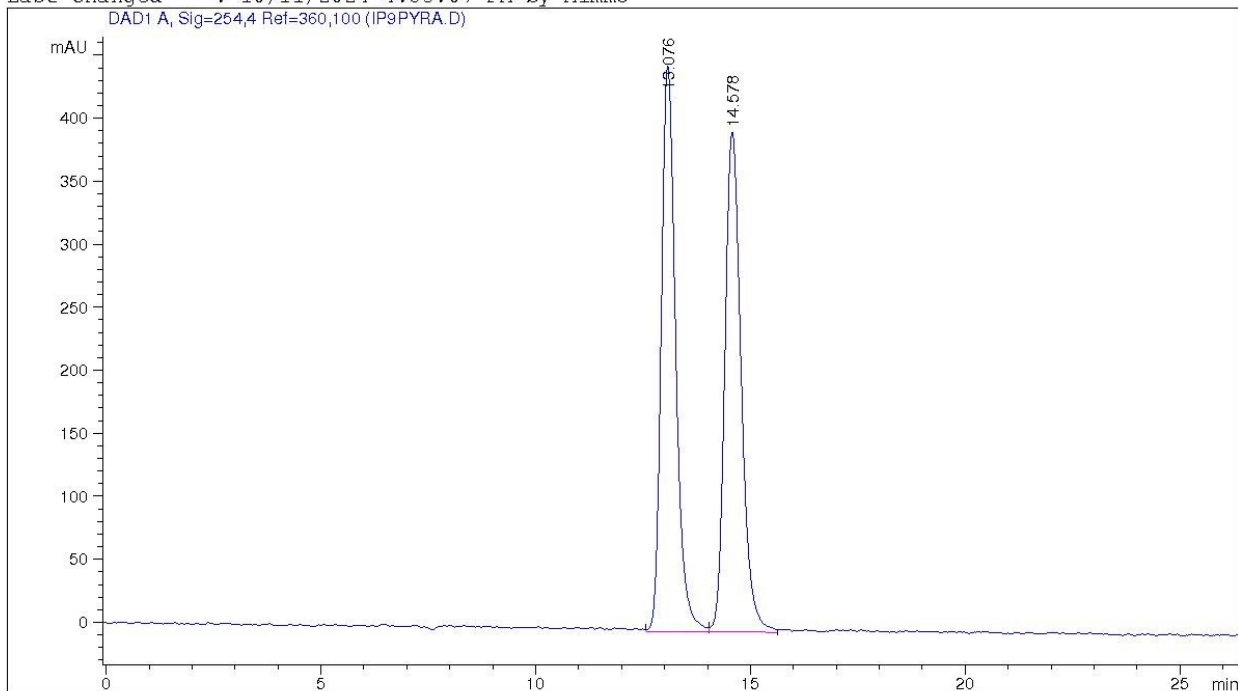

```
=====  
Area Percent Report  
=====
```

```
Sorted By      :      Signal  
Multiplier     :      1.0000  
Dilution       :      1.0000
```

Signal 1: DAD1 A, Sig=254,4 Ref=360,100

| Peak # | RetTime [min] | Type | Width [min] | Area [mAU*s] | Height [mAU] | Area %  |
|--------|---------------|------|-------------|--------------|--------------|---------|
| 1      | 13.076        | VV   | 0.3639      | 1.04661e4    | 449.01904    | 49.9125 |
| 2      | 14.578        | VV   | 0.4046      | 1.05028e4    | 397.03339    | 50.0875 |

Totals : 2.09689e4 846.05243

Results obtained with enhanced integrator!

```
=====  
*** End of Report ***
```

**Figure S27.**HPLC of racemic 2-(4-bromophenylmethylsulfinyl)pyridine **4b**.



ip10 pBrPhSOCH2-2Py cristallizzato Bis  
Chiralcel OD-H 70:30

```
=====
Injection Date   : 1/24/2023 10:28:37 AM
Sample Name      : IP10-2PycristBis           Location : Vial 1
Acq. Operator    : Mimmo
Acq. Method      : C:\HPCHEM\1\METHODS\ESANOIPA.M
Last changed     : 1/24/2023 8:59:11 AM by Mimmo
                  (modified after loading)
Analysis Method  : C:\HPCHEM\1\METHODS\ESANOIPA.M
Last changed     : 10/11/2024 4:53:07 PM by Mimmo
=====
```

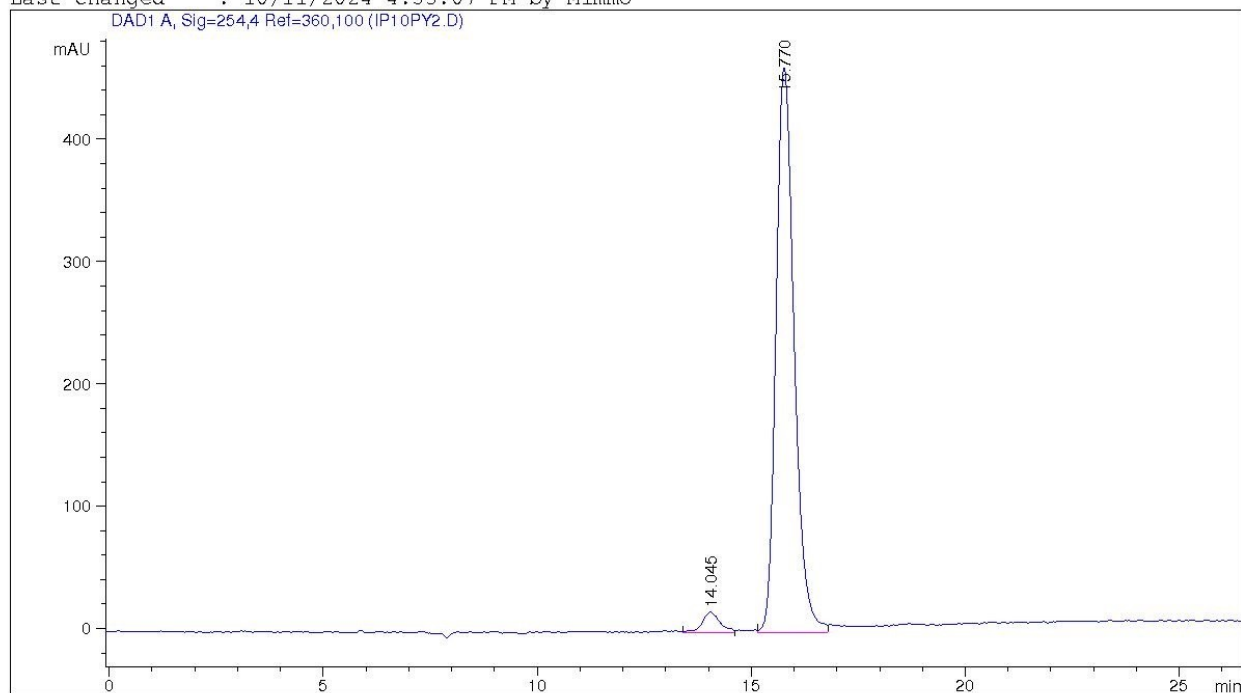

```
=====
Area Percent Report
=====
```

```
Sorted By      :      Signal
Multiplier     :      1.0000
Dilution       :      1.0000
```

Signal 1: DAD1 A, Sig=254,4 Ref=360,100

| Peak # | RetTime [min] | Type | Width [min] | Area [mAU*s] | Height [mAU] | Area %  |
|--------|---------------|------|-------------|--------------|--------------|---------|
| 1      | 14.045        | BV   | 0.3889      | 480.18973    | 16.62938     | 3.3990  |
| 2      | 15.770        | VV   | 0.4529      | 1.36474e4    | 461.65616    | 96.6010 |

Totals :                    1.41276e4    478.28554

Results obtained with enhanced integrator!

```
=====
*** End of Report ***
=====
```

**Figure S28.** HPLC of (*R*)- 2-(4-bromophenylmethylsulfinyl)pyridine **4b**.

IP2 BzImSOCH2Ph verifica  
Chiralpak IA n-Esano/i-Propanolo 70:30

```
=====
Injection Date   : 10/11/2024 12:33:55 PM
Sample Name      : BzImSOCH2Ph                Location : Vial 1
Acq. Operator    : Mimmo
Acq. Method      : C:\HPCHEM\1\METHODS\ESANOIPA.M
Last changed     : 10/11/2024 11:41:05 AM by Mimmo
Analysis Method  : C:\HPCHEM\1\METHODS\ESANOIPA.M
Last changed     : 10/11/2024 4:53:07 PM by Mimmo
=====
```

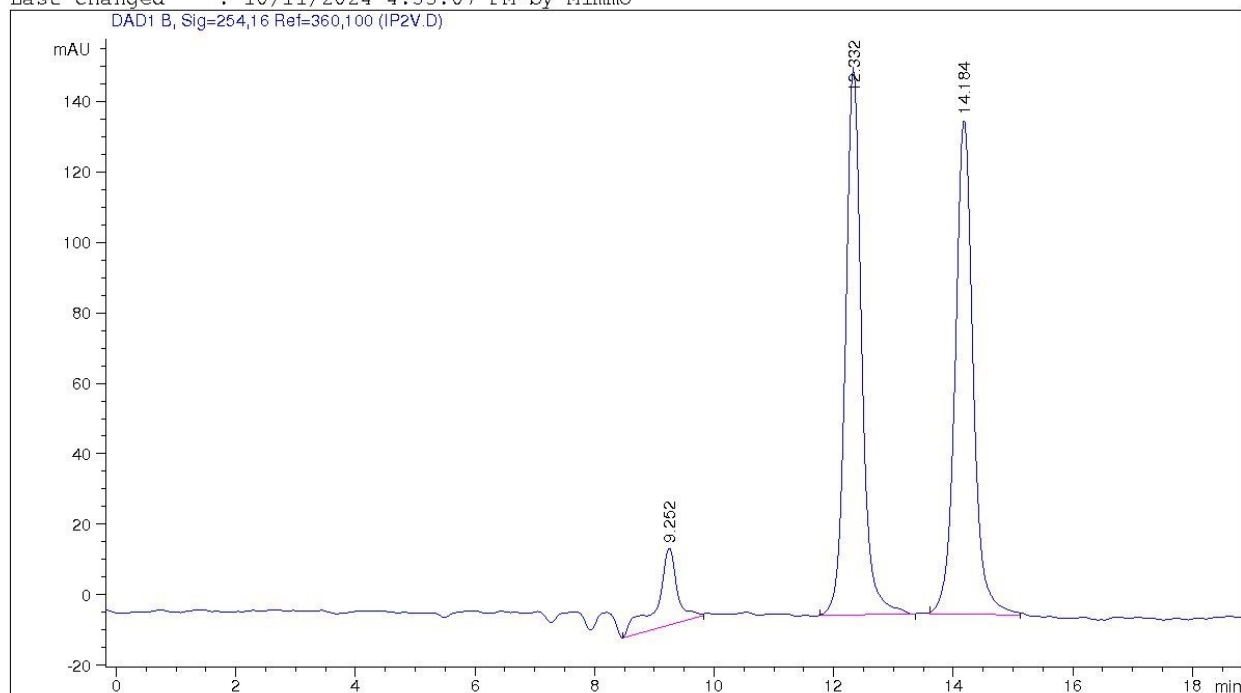

```
=====
                          Area Percent Report
=====
```

```
Sorted By           :      Signal
Multiplier           :      1.0000
Dilution             :      1.0000
```

Signal 1: DAD1 B, Sig=254,16 Ref=360,100

| Peak # | RetTime [min] | Type | Width [min] | Area [mAU*s] | Height [mAU] | Area %  |
|--------|---------------|------|-------------|--------------|--------------|---------|
| 1      | 9.252         | VB   | 0.3304      | 515.55560    | 21.92036     | 8.0977  |
| 2      | 12.332        | BP   | 0.2918      | 2925.08203   | 155.23112    | 45.9438 |
| 3      | 14.184        | BB   | 0.3228      | 2926.01514   | 140.57578    | 45.9585 |

Totals :                    6366.65277   317.72726

Results obtained with enhanced integrator!

```
=====
*** End of Report ***
=====
```

**Figure S29.**HPLC of racemic 2-Benzylsulfinyl-1*H*-benzo[d]imidazole **5b**.

C685 BzImSOCH2-Ph Toluene CHP cristallizzato  
Chiralpak IA 70:30

```
=====
Injection Date   : 1/24/2023 12:16:00 PM
Sample Name      : C685BzIm_xx                Location : Vial 1
Acq. Operator    : Mimmo
Acq. Method      : C:\HPCHEM\1\METHODS\ESANOIPA.M
Last changed     : 1/24/2023 11:10:20 AM by Mimmo
                  (modified after loading)
Analysis Method  : C:\HPCHEM\1\METHODS\ESANOIPA.M
Last changed     : 10/25/2024 6:00:30 PM by Mimmo
                  (modified after loading)
=====
```

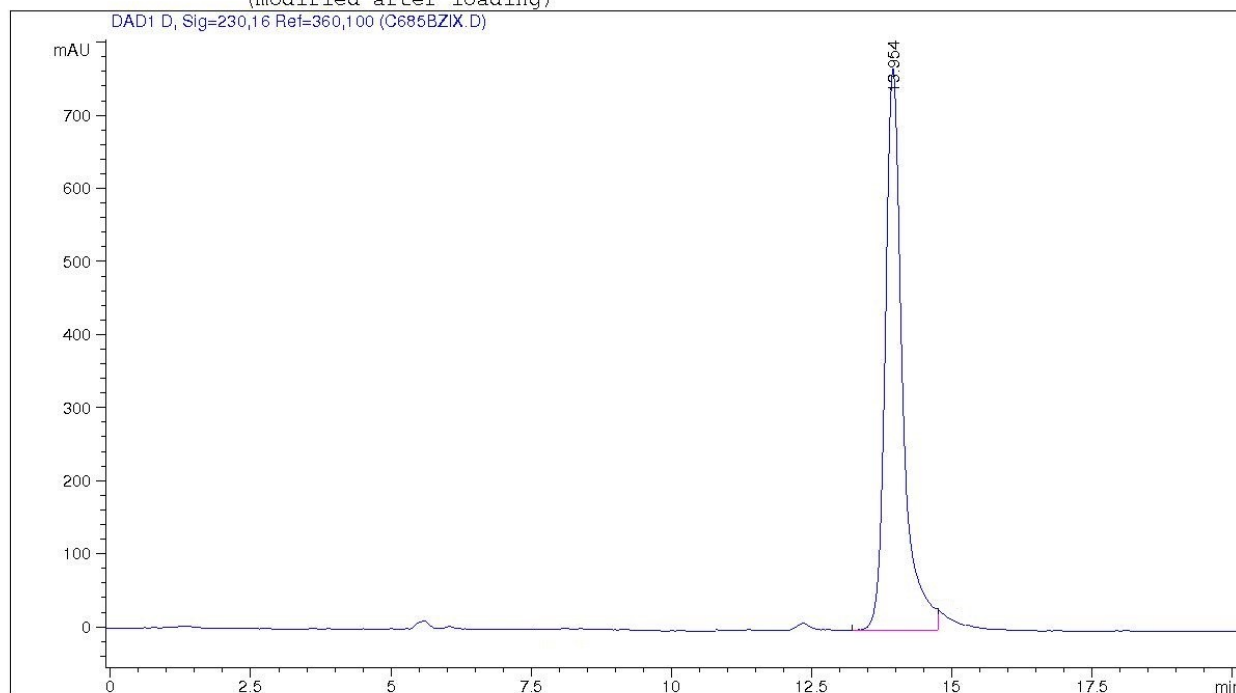

```
=====
                          Area Percent Report
=====
```

```
Sorted By      :      Signal
Multiplier     :      1.0000
Dilution       :      1.0000
```

Signal 1: DAD1 D, Sig=230,16 Ref=360,100

| Peak # | RetTime [min] | Type | Width [min] | Area [mAU*s] | Height [mAU] | Area %   |
|--------|---------------|------|-------------|--------------|--------------|----------|
| 1      | 13.954        | PV   | 0.3225      | 1.65057e4    | 768.86505    | 100.0000 |

Totals :                    1.65057e4    768.86505

Results obtained with enhanced integrator!

```
=====
*** End of Report ***
=====
```

**Figure S30.** HPLC of (*R*)-2-Benzylsulfinyl-1*H*-benzo[d]imidazole **5b**

ccn57 BzImSOpentafluorobenzil racemico  
Chiralpak IA esano:IPA 70:30 0.5 ml/min

```
=====  
Injection Date   : 2/4/2022 11:17:47 AM  
Sample Name     : BzImSOCH2C6F5rac           Location : Vial 1  
Acq. Operator   : Mimmo  
Acq. Method     : C:\HPCHEM\1\METHODS\ESANOIPA.M  
Last changed    : 2/4/2022 8:32:45 AM by Mimmo  
                 (modified after loading)  
Analysis Method : C:\HPCHEM\1\METHODS\ESANOIPA.M  
Last changed    : 10/11/2024 4:53:07 PM by Mimmo  
DAD1 A, Sig=254,4 Ref=360,100 (CCN57R.D)
```

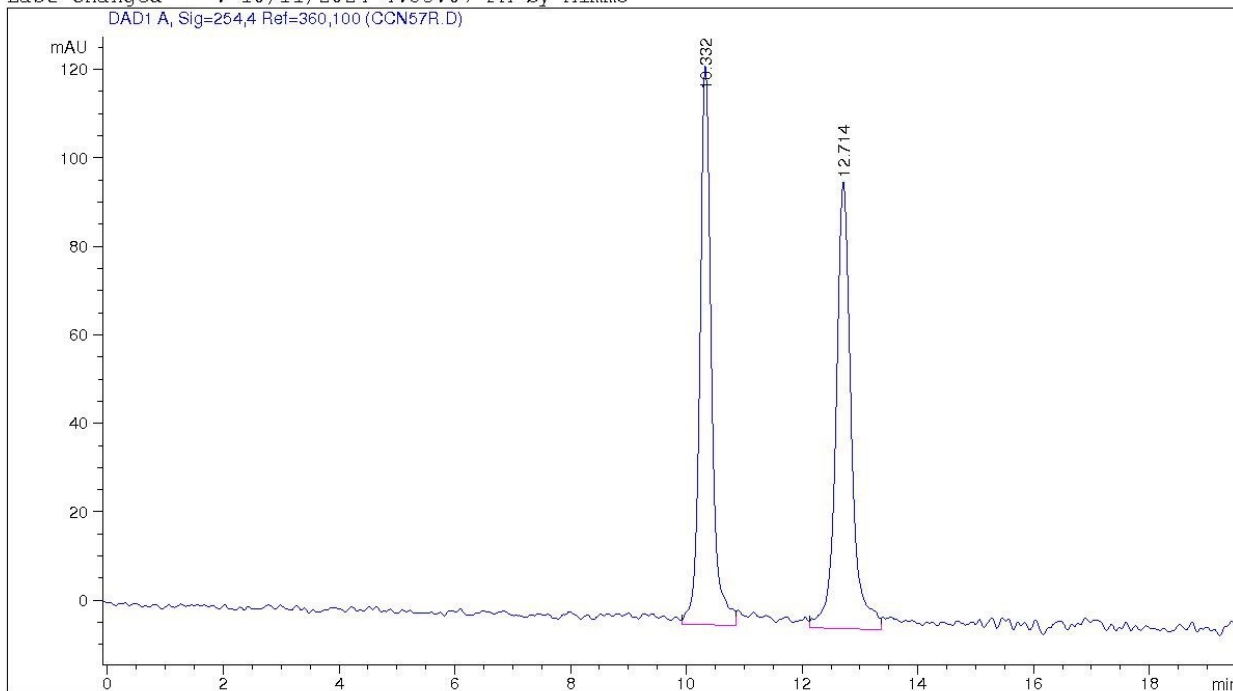

```
=====  
Area Percent Report  
=====
```

```
Sorted By      :      Signal  
Multiplier    :      1.0000  
Dilution      :      1.0000
```

Signal 1: DAD1 A, Sig=254,4 Ref=360,100

| Peak # | RetTime [min] | Type | Width [min] | Area [mAU*s] | Height [mAU] | Area %  |
|--------|---------------|------|-------------|--------------|--------------|---------|
| 1      | 10.332        | VV   | 0.2107      | 1763.33301   | 126.46920    | 48.8257 |
| 2      | 12.714        | VV   | 0.2696      | 1848.15369   | 100.94040    | 51.1743 |

Totals :                    3611.48669   227.40960

Results obtained with enhanced integrator!

```
=====  
*** End of Report ***
```

**Figure S31.** HPLC of racemic 2-(2,3,4,5,6-pentafluorobenzylsulfinyl)-1*H*-benzo[d]imidazole **9b**

C668 2-THiophSOCH2C6F5 verifica  
Chiralpak IA n-Esano/i-Propanolo 70:30

```

=====
Injection Date   : 10/11/2024 11:43:25 AM
Sample Name     : ThSOCH2C6F5                Location  : Vial 1
Acq. Operator   : Mimmo
Acq. Method     : C:\HPCHEM\1\METHODS\ESANOIPA.M
Last changed    : 10/11/2024 11:41:05 AM by Mimmo
Analysis Method : C:\HPCHEM\1\METHODS\ESANOIPA.M
Last changed    : 10/11/2024 4:53:07 PM by Mimmo
=====

```

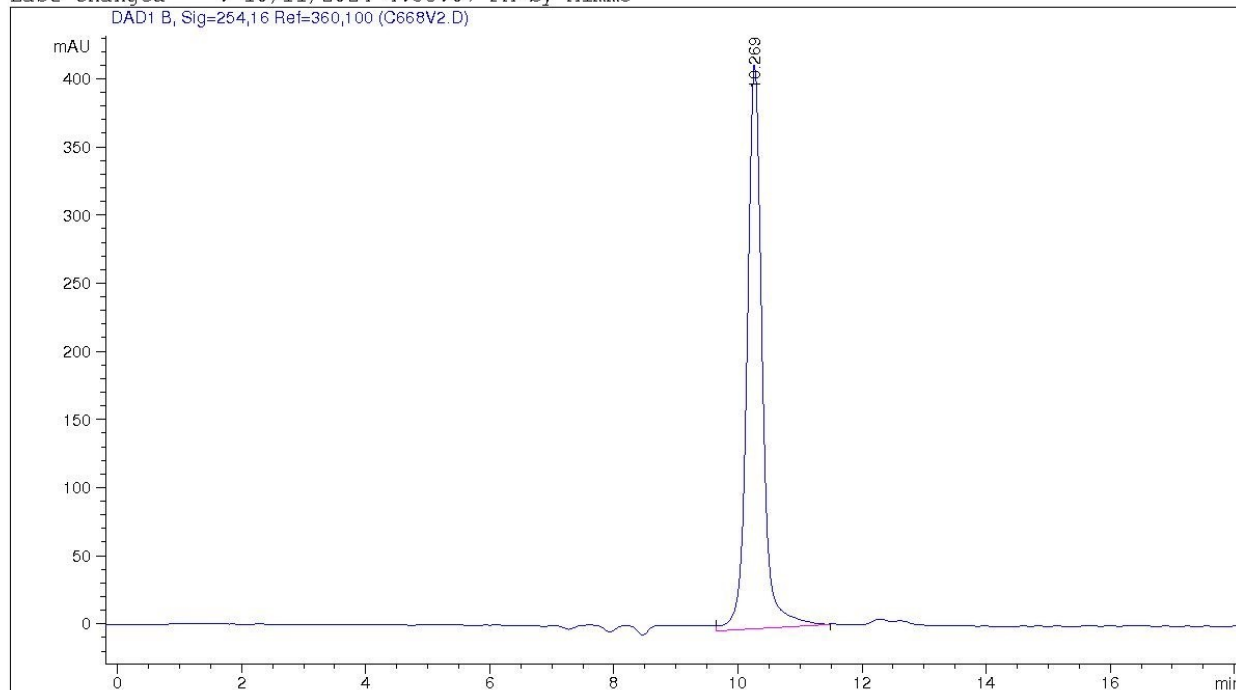

```

=====
                          Area Percent Report
=====

```

```

Sorted By           :      Signal
Multiplier          :      1.0000
Dilution            :      1.0000

```

Signal 1: DAD1 B, Sig=254,16 Ref=360,100

| Peak # | RetTime [min] | Type | Width [min] | Area [mAU*s] | Height [mAU] | Area %   |
|--------|---------------|------|-------------|--------------|--------------|----------|
| 1      | 10.269        | VB   | 0.2538      | 7034.26318   | 414.81137    | 100.0000 |

```
Totals :                7034.26318  414.81137
```

Results obtained with enhanced integrator!

```

=====
*** End of Report ***
=====

```

**Figure S32.** HPLC of (*R*)-2-(2,3,4,5,6-pentafluorobenzylsulfinyl)-1*H*-benzo[d]imidazole **9b**

C686 BzIm\_N-Met-SOBz racemo  
Chiralpak IA esano: i-propanolo 70:30

```
=====  
Injection Date   : 2/24/2023 9:33:22 AM  
Sample Name     : c686Nmetracem           Location : Vial 1  
Acq. Operator   : Mimmo  
Acq. Method     : C:\HPCHEM\1\METHODS\ESANOIPA.M  
Last changed    : 2/24/2023 8:51:04 AM by Mimmo  
                 (modified after loading)  
Analysis Method : C:\HPCHEM\1\METHODS\ESANOIPA.M  
Last changed    : 10/11/2024 4:53:07 PM by Mimmo  
DAD1 D, Sig=230,16 Ref=360,100 (C686.D)
```

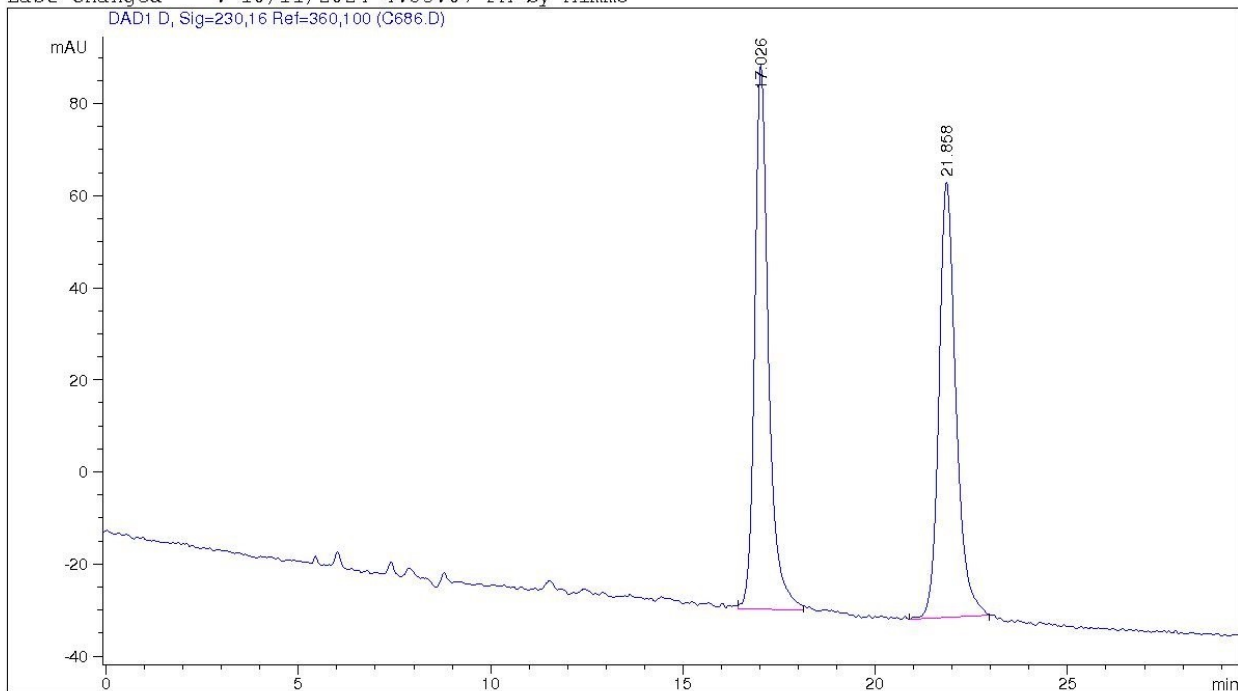

```
=====  
Area Percent Report  
=====
```

```
Sorted By      :      Signal  
Multiplier     :      1.0000  
Dilution       :      1.0000
```

Signal 1: DAD1 D, Sig=230,16 Ref=360,100

| Peak # | RetTime [min] | Type | Width [min] | Area [mAU*s] | Height [mAU] | Area %  |
|--------|---------------|------|-------------|--------------|--------------|---------|
| 1      | 17.026        | BB   | 0.3713      | 2948.19946   | 118.07216    | 50.3596 |
| 2      | 21.858        | VB   | 0.4583      | 2906.09326   | 94.62715     | 49.6404 |

Totals :                    5854.29272   212.69931

Results obtained with enhanced integrator!

```
=====  
*** End of Report ***
```

**Figure S33.** HPLC of racemic 2-Benzylsulfinyl-1-methyl-1*H*-benzo[d]imidazole **10b**
